# Supplementary material for: An Integrated Risk Function for Estimating the Global Burden of Disease Attributable to Ambient Fine Particulate Matter Exposure
Source: PubMed Central journal article supplement (PMC3984213; doi:10.1289/ehp.1307049), 2014-02-11
Supplement: ehp.1307049.s001.pdf [file ehp.1307049.s001.pdf]

## Supplemental Material

### **An Integrated Risk Function for Estimating the Global Burden of Disease Attributable to Ambient Fine Particulate Matter Exposure**

Richard T. Burnett, C. Arden Pope III, Majid Ezzati, Casey Olives, Stephen S. Lim, Sumi Mehta, Hwashin H. Shin, Gitanjali Singh, Bryan Hubbell, Michael Brauer, H. Ross Anderson, Kirk R. Smith, John R. Balmes, Nigel G. Bruce, Haidong Kan, Francine Laden, Annette Prüss-Ustün, Michelle C. Turner, Susan M. Gapstur, W. Ryan Diver, and Aaron Cohen

| <b><u>Table of Contents</u></b>                                                                       | <b><u>Page</u></b> |
|-------------------------------------------------------------------------------------------------------|--------------------|
| <b>Table S1.</b>                                                                                      | <b>2</b>           |
| <b>Sensitivity of RRs and PAFs to model form</b>                                                      | <b>9</b>           |
| <b>Figure S1–S14</b>                                                                                  | <b>12</b>          |
| <b>Table S2.</b>                                                                                      | <b>26</b>          |
| <b>Characterizing Uncertainty</b>                                                                     | <b>28</b>          |
| <i>Uncertainty in the estimates of (<math>\alpha</math>, <math>\beta</math>, <math>\delta</math>)</i> | 28                 |
| <i>Uncertainty in the exposure estimate of <math>PM_{2.5}</math></i>                                  | 28                 |
| <i>Uncertainty in the counterfactual concentration</i>                                                | 29                 |
| <i>Uncertainty in the population attributable risk</i>                                                | 29                 |
| <b>Age-modification risk models for ischemic heart disease and stroke mortality</b>                   | <b>29</b>          |
| <b>Figure S15.</b>                                                                                    | <b>31</b>          |
| <b>References</b>                                                                                     | <b>32</b>          |

**Table S1.** Logarithm of relative risks and standard errors per  $\mu\text{g}/\text{m}^3$  of  $\text{PM}_{2.5}$  by outcome and type of combustion used to fit Integrated Exposure-Response Model. If RR obtained from published source reference is given. RR obtained from original analysis indicated under Study Reference. Denominator concentration used for COPD and LC HAPs RR and ALRI incidence rates.

| Study Reference                  | Outcome | PM <sub>2.5</sub> Combustion Type | Logarithm of RR/ $\mu\text{g}/\text{m}^3$ | Standard Error | PM <sub>2.5</sub> Concentration Used to Evaluate RR | PM <sub>2.5</sub> Denominator Concentration |
|----------------------------------|---------|-----------------------------------|-------------------------------------------|----------------|-----------------------------------------------------|---------------------------------------------|
| Original analysis based on ACS   | IHD     | AAP                               | 0.023111                                  | 0.00443        | 14.2                                                |                                             |
| Lepeule et al. 2012              | IHD     | AAP                               | 0.028518                                  | 0.007865       | 15.9                                                |                                             |
| Lipsett et al. 2011              | IHD     | AAP                               | 0.018232                                  | 0.007701       | 15.6                                                |                                             |
| Puett et al. 2009                | IHD     | AAP                               | 0.07031                                   | 0.032196       | 13.9                                                |                                             |
| Miller et al. 2007               | IHD     | AAP                               | 0.079299                                  | 0.03236        | 13.5                                                |                                             |
| Chen et al. 2005                 | IHD     | AAP                               | 0                                         | 0.007118       | 29                                                  |                                             |
| Puett et al. 2011                | IHD     | AAP                               | -0.00202                                  | 0.016446       | 17.9                                                |                                             |
| Beelen et al. 2008               | IHD     | AAP                               | -0.00408                                  | 0.012412       | 28.3                                                |                                             |
| Svendsen et al. 1987 (Males)     | IHD     | SHS                               | -0.10536                                  | 1.483197       | 20                                                  |                                             |
| Hole et al. 1989 (Males)         | IHD     | SHS                               | 0.737164                                  | 0.634965       | 20                                                  |                                             |
| Hirayama et al. 1990 (Males)     | IHD     | SHS                               | 0.076961                                  | 0.093807       | 20                                                  |                                             |
| La Vecchia et al. 1993 (Males)   | IHD     | SHS                               | 0.122218                                  | 0.468175       | 20                                                  |                                             |
| He et al. 1994 (Males)           | IHD     | SHS                               | 0.476234                                  | 0.60933        | 20                                                  |                                             |
| Steenland et al. 1996 (Males)    | IHD     | SHS                               | 0.270027                                  | 0.108203       | 20                                                  |                                             |
| Ciruzzi et al. 1998 (Males)      | IHD     | SHS                               | 0.215111                                  | 0.361876       | 20                                                  |                                             |
| Rosenlund et al. 2001 (Males)    | IHD     | SHS                               | 0.019803                                  | 0.169737       | 20                                                  |                                             |
| Svendsen et al. 1987 (Females)   | IHD     | SHS                               | 1.166271                                  | 0.720849       | 50                                                  |                                             |
| Hole et al. 1989 (Females)       | IHD     | SHS                               | 1.415853                                  | 0.625511       | 50                                                  |                                             |
| Hirayama et al. 1990 (Females)   | IHD     | SHS                               | 0.262364                                  | 0.105034       | 50                                                  |                                             |
| La Vecchia et al. 1993 (Females) | IHD     | SHS                               | 0.262364                                  | 0.489011       | 50                                                  |                                             |
| He et al. 1994 (Females)         | IHD     | SHS                               | 1.269761                                  | 0.754263       | 50                                                  |                                             |
| Steenland et al. 1996 (Females)  | IHD     | SHS                               | 0.131028                                  | 0.082431       | 50                                                  |                                             |
| Ciruzzi et al. 1998 (Females)    | IHD     | SHS                               | 1.393766                                  | 0.714909       | 50                                                  |                                             |
| Rosenlund et al. 2001 (Females)  | IHD     | SHS                               | 0.457425                                  | 0.247568       | 50                                                  |                                             |
| Pope et al. 2011                 | IHD     | AS                                | 0.476234                                  | 0.119648       | 1000                                                |                                             |
| Pope et al. 2011                 | IHD     | AS                                | 0.494696                                  | 0.091361       | 3667                                                |                                             |

| <b>Study Reference</b>          | <b>Outcome</b> | <b>PM<sub>2.5</sub><br/>Combustion<br/>Type</b> | <b>Logarithm<br/>of<br/>RR/<math>\mu\text{g}/\text{m}^3</math></b> | <b>Standard<br/>Error</b> | <b>PM<sub>2.5</sub><br/>Concentration<br/>Used to<br/>Evaluate RR</b> | <b>PM<sub>2.5</sub><br/>Denominator<br/>Concentration</b> |
|---------------------------------|----------------|-------------------------------------------------|--------------------------------------------------------------------|---------------------------|-----------------------------------------------------------------------|-----------------------------------------------------------|
| Pope et al. 2011                | IHD            | AS                                              | 0.727549                                                           | 0.058031                  | 6667                                                                  |                                                           |
| Pope et al. 2011                | IHD            | AS                                              | 0.779325                                                           | 0.073388                  | 10000                                                                 |                                                           |
| Pope et al. 2011                | IHD            | AS                                              | 0.858662                                                           | 0.038824                  | 13333                                                                 |                                                           |
| Pope et al. 2011                | IHD            | AS                                              | 0.828552                                                           | 0.092984                  | 16667                                                                 |                                                           |
| Pope et al. 2011                | IHD            | AS                                              | 0.797507                                                           | 0.059757                  | 20000                                                                 |                                                           |
| Pope et al. 2011                | IHD            | AS                                              | 0.947789                                                           | 0.152309                  | 23333                                                                 |                                                           |
| Pope et al. 2011                | IHD            | AS                                              | 0.832909                                                           | 0.059647                  | 26667                                                                 |                                                           |
| Pope et al. 2011                | IHD            | AS                                              | 0.693147                                                           | 0.108631                  | 30000                                                                 |                                                           |
| Original analysis based on ACS  | STROKE         | AAP                                             | 0.011333                                                           | 0.004982                  | 14.2                                                                  |                                                           |
| Lepeule et al. 2012             | STROKE         | AAP                                             | -0.00408                                                           | 0.015987                  | 15.9                                                                  |                                                           |
| Lipsett et al. 2011             | STROKE         | AAP                                             | 0.014842                                                           | 0.011407                  | 15.6                                                                  |                                                           |
| Miller et al. 2007              | STROKE         | AAP                                             | 0.060432                                                           | 0.025364                  | 13.4                                                                  |                                                           |
| Beelen et al. 2008              | STROKE         | AAP                                             | 0.048243                                                           | 0.021029                  | 28.3                                                                  |                                                           |
| Gillis et al. 1984 (Males)      | STROKE         | SHS                                             | -1.10866                                                           | 1.087418                  | 35                                                                    |                                                           |
| Gillis et al. 1984 (Females)    | STROKE         | SHS                                             | 0.631272                                                           | 1.093869                  | 35                                                                    |                                                           |
| Sandler et al. 1989 (Males)     | STROKE         | SHS                                             | -0.03046                                                           | 0.206434                  | 35                                                                    |                                                           |
| Sandler et al. 1989 (Females)   | STROKE         | SHS                                             | 0.215111                                                           | 0.094188                  | 35                                                                    |                                                           |
| Yamada et al. 2003 (Males)      | STROKE         | SHS                                             | 0.122218                                                           | 0.904277                  | 35                                                                    |                                                           |
| Yamada et al. 2003 (Females)    | STROKE         | SHS                                             | -0.06188                                                           | 0.255197                  | 35                                                                    |                                                           |
| Iribarren et al. 2004 (Males)   | STROKE         | SHS                                             | 0.019803                                                           | 0.187381                  | 35                                                                    |                                                           |
| Iribarren er al. 2004 (Females) | STROKE         | SHS                                             | 0.157004                                                           | 0.124706                  | 35                                                                    |                                                           |
| Whincup et al. 2004 (Males)     | STROKE         | SHS                                             | 0.431782                                                           | 0.41577                   | 35                                                                    |                                                           |
| Qureshi et al. 2005 (Females)   | STROKE         | SHS                                             | -0.10536                                                           | 0.197242                  | 35                                                                    |                                                           |
| Wen et al. 2006 (Females)       | STROKE         | SHS                                             | 0.41871                                                            | 0.175639                  | 35                                                                    |                                                           |
| Hill et al. 2007 (Males)        | STROKE         | SHS                                             | 0.463734                                                           | 0.168868                  | 35                                                                    |                                                           |
| Hill et al. 2007 (Females)      | STROKE         | SHS                                             | -0.10536                                                           | 0.15079                   | 35                                                                    |                                                           |
| Hill et al. 2007 (Males)        | STROKE         | SHS                                             | 0.598837                                                           | 0.213399                  | 35                                                                    |                                                           |
| Hill et al. 2007 (Females)      | STROKE         | SHS                                             | 0.157004                                                           | 0.222774                  | 35                                                                    |                                                           |
| Glymour et al. 2008 (Males)     | STROKE         | SHS                                             | 0.48858                                                            | 0.300914                  | 35                                                                    |                                                           |
| Glymour et al. 2008 (Females)   | STROKE         | SHS                                             | 0.378436                                                           | 0.198807                  | 35                                                                    |                                                           |
| Glymour et al. 2008 (Males)     | STROKE         | SHS                                             | 0.565314                                                           | 0.15551                   | 35                                                                    |                                                           |
| Glymour et al. 2008 (Females)   | STROKE         | SHS                                             | 0.444686                                                           | 0.314322                  | 35                                                                    |                                                           |

| <b>Study Reference</b>         | <b>Outcome</b> | <b>PM<sub>2.5</sub><br/>Combustion<br/>Type</b> | <b>Logarithm<br/>of<br/>RR/<math>\mu\text{g}/\text{m}^3</math></b> | <b>Standard<br/>Error</b> | <b>PM<sub>2.5</sub><br/>Concentration<br/>Used to<br/>Evaluate RR</b> | <b>PM<sub>2.5</sub><br/>Denominator<br/>Concentration</b> |
|--------------------------------|----------------|-------------------------------------------------|--------------------------------------------------------------------|---------------------------|-----------------------------------------------------------------------|-----------------------------------------------------------|
| Jefferis et al. 2010           | STROKE         | SHS                                             | -0.06188                                                           | 0.083547                  | 35                                                                    |                                                           |
| Original analysis based on ACS | STROKE         | AS                                              | 0.157004                                                           | 0.279005                  | 1000                                                                  |                                                           |
| Original analysis based on ACS | STROKE         | AS                                              | 0.708036                                                           | 0.159101                  | 3667                                                                  |                                                           |
| Original analysis based on ACS | STROKE         | AS                                              | 0.756122                                                           | 0.111752                  | 6667                                                                  |                                                           |
| Original analysis based on ACS | STROKE         | AS                                              | 0.582216                                                           | 0.164769                  | 10000                                                                 |                                                           |
| Original analysis based on ACS | STROKE         | AS                                              | 0.887891                                                           | 0.080345                  | 13333                                                                 |                                                           |
| Original analysis based on ACS | STROKE         | AS                                              | 1.026042                                                           | 0.190406                  | 16667                                                                 |                                                           |
| Original analysis based on ACS | STROKE         | AS                                              | 0.845868                                                           | 0.132851                  | 20000                                                                 |                                                           |
| Original analysis based on ACS | STROKE         | AS                                              | 0.824175                                                           | 0.382641                  | 23333                                                                 |                                                           |
| Original analysis based on ACS | STROKE         | AS                                              | 0.774727                                                           | 0.140318                  | 26667                                                                 |                                                           |
| Original analysis based on ACS | STROKE         | AS                                              | 0.741937                                                           | 0.265557                  | 30000                                                                 |                                                           |
| Original analysis based on ACS | COPD           | AAP                                             | 0.004879                                                           | 0.005314                  | 14.2                                                                  |                                                           |
| Lepeule et al. 2012            | COPD           | AAP                                             | 0.0157                                                             | 0.015748                  | 15.9                                                                  |                                                           |
| Lipsett et al. 2011            | COPD           | AAP                                             | 0.017395                                                           | 0.015568                  | 15.6                                                                  |                                                           |
| Smith et al. 2014              | COPD           | HAP                                             | 0.641854                                                           | 0.255426                  | 200                                                                   | 65                                                        |
| Smith et al. 2014              | COPD           | HAP                                             | 0.993                                                              | 0.167                     | 330                                                                   | 100                                                       |
| Original analysis based on ACS | COPD           | AS                                              | 1.413423                                                           | 0.362642                  | 1000                                                                  |                                                           |
| Original analysis based on ACS | COPD           | AS                                              | 1.94591                                                            | 0.200793                  | 3667                                                                  |                                                           |
| Original analysis based on ACS | COPD           | AS                                              | 1.796747                                                           | 0.154106                  | 6667                                                                  |                                                           |
| Original analysis based on ACS | COPD           | AS                                              | 1.859418                                                           | 0.195083                  | 10000                                                                 |                                                           |
| Original analysis based on ACS | COPD           | AS                                              | 2.107786                                                           | 0.112795                  | 13333                                                                 |                                                           |
| Original analysis based on ACS | COPD           | AS                                              | 1.631199                                                           | 0.302756                  | 16667                                                                 |                                                           |
| Original analysis based on ACS | COPD           | AS                                              | 2.393339                                                           | 0.151127                  | 20000                                                                 |                                                           |
| Original analysis based on ACS | COPD           | AS                                              | 2.788093                                                           | 0.330657                  | 23333                                                                 |                                                           |
| Original analysis based on ACS | COPD           | AS                                              | 2.48574                                                            | 0.152194                  | 26667                                                                 |                                                           |
| Original analysis based on ACS | COPD           | AS                                              | 2.203869                                                           | 0.285136                  | 30000                                                                 |                                                           |
| Original analysis based on ACS | LC             | AAP                                             | 0.013103                                                           | 0.003795                  | 14.2                                                                  |                                                           |
| Lepeule et al. 2012            | LC             | AAP                                             | 0.031481                                                           | 0.014427                  | 15.9                                                                  |                                                           |
| Lipsett et al. 2011            | LC             | AAP                                             | -0.00513                                                           | 0.015034                  | 15.6                                                                  |                                                           |
| Beelen et al. 2008             | LC             | AAP                                             | 0.005827                                                           | 0.013279                  | 28.3                                                                  |                                                           |
| Brownson et al. 1992           | LC             | SHS                                             | 0.518794                                                           | 0.745212                  | 35                                                                    |                                                           |
| Chan and Fung 1982             | LC             | SHS                                             | -0.28768                                                           | 0.282228                  | 35                                                                    |                                                           |

| <b>Study Reference</b>   | <b>Outcome</b> | <b>PM<sub>2.5</sub><br/>Combustion<br/>Type</b> | <b>Logarithm<br/>of<br/>RR/<math>\mu\text{g}/\text{m}^3</math></b> | <b>Standard<br/>Error</b> | <b>PM<sub>2.5</sub><br/>Concentration<br/>Used to<br/>Evaluate RR</b> | <b>PM<sub>2.5</sub><br/>Denominator<br/>Concentration</b> |
|--------------------------|----------------|-------------------------------------------------|--------------------------------------------------------------------|---------------------------|-----------------------------------------------------------------------|-----------------------------------------------------------|
| Correa et al, 1983       | LC             | SHS                                             | 0.727549                                                           | 0.476773                  | 35                                                                    |                                                           |
| Garfinkel et al. 1985    | LC             | SHS                                             | 0.239017                                                           | 0.191404                  | 35                                                                    |                                                           |
| Geng et al. 1987         | LC             | SHS                                             | 0.770108                                                           | 0.353055                  | 35                                                                    |                                                           |
| Inoue and Hirayama 1987  | LC             | SHS                                             | 0.936093                                                           | 0.634192                  | 35                                                                    |                                                           |
| Kabat et al. 1995        | LC             | SHS                                             | 0.076961                                                           | 0.299366                  | 35                                                                    |                                                           |
| Kabat et al. Wynder 1984 | LC             | SHS                                             | -0.23572                                                           | 0.58224                   | 35                                                                    |                                                           |
| Kalandidi et al. 1990    | LC             | SHS                                             | 0.641854                                                           | 0.326769                  | 35                                                                    |                                                           |
| Ko et al. 1997           | LC             | SHS                                             | 0.262364                                                           | 0.324736                  | 35                                                                    |                                                           |
| Lam et al. 1987          | LC             | SHS                                             | 0.698135                                                           | 0.313149                  | 35                                                                    |                                                           |
| Lee et al. 2000          | LC             | SHS                                             | 0                                                                  | 0.507959                  | 35                                                                    |                                                           |
| Liu et al. 1993          | LC             | SHS                                             | 0.506818                                                           | 0.419499                  | 35                                                                    |                                                           |
| Shimizu et al. 1988      | LC             | SHS                                             | 0.076961                                                           | 0.266613                  | 35                                                                    |                                                           |
| Sobue 1990               | LC             | SHS                                             | 0.122218                                                           | 0.188021                  | 35                                                                    |                                                           |
| Trichopoulos et al. 1983 | LC             | SHS                                             | 0.875469                                                           | 0.396262                  | 35                                                                    |                                                           |
| Zaridze et al. 1998      | LC             | SHS                                             | 0.425268                                                           | 0.187429                  | 35                                                                    |                                                           |
| Akiba et al. 1986        | LC             | SHS                                             | 0.405465                                                           | 0.260625                  | 35                                                                    |                                                           |
| Boffetta et al. 1999     | LC             | SHS                                             | 0.10436                                                            | 0.116617                  | 35                                                                    |                                                           |
| Brownson et al. 1987     | LC             | SHS                                             | 0                                                                  | 0.103435                  | 35                                                                    |                                                           |
| Bufler et a. 1984        | LC             | SHS                                             | -0.22314                                                           | 0.438945                  | 35                                                                    |                                                           |
| Fontham et al. 1994      | LC             | SHS                                             | 0.254642                                                           | 0.109894                  | 35                                                                    |                                                           |
| Gao et al. 1987          | LC             | SHS                                             | 0.173953                                                           | 0.190452                  | 35                                                                    |                                                           |
| Humble et al. 1987       | LC             | SHS                                             | 0.587787                                                           | 0.662055                  | 35                                                                    |                                                           |
| Koo et al. 1997          | LC             | SHS                                             | 0.494696                                                           | 0.323325                  | 35                                                                    |                                                           |
| Lam et al. 1987          | LC             | SHS                                             | 0.500775                                                           | 0.180101                  | 35                                                                    |                                                           |
| Liu et al. 1991          | LC             | SHS                                             | -0.26136                                                           | 0.478805                  | 35                                                                    |                                                           |
| Nyberg et al. 1997       | LC             | SHS                                             | 0.04879                                                            | 0.288623                  | 35                                                                    |                                                           |
| Pershagen et al. 1987    | LC             | SHS                                             | 0.182322                                                           | 0.280258                  | 35                                                                    |                                                           |
| Shen et al. 1998         | LC             | SHS                                             | 0.48858                                                            | 0.444916                  | 35                                                                    |                                                           |
| Stockwell et al. 1992    | LC             | SHS                                             | 0.470004                                                           | 0.345547                  | 35                                                                    |                                                           |
| Svenson et al. 1989      | LC             | SHS                                             | 0.231112                                                           | 0.406965                  | 35                                                                    |                                                           |
| Wang et al. 1996         | LC             | SHS                                             | 0.10436                                                            | 0.270932                  | 35                                                                    |                                                           |
| Wu et al. 1985           | LC             | SHS                                             | 0.182322                                                           | 0.36406                   | 35                                                                    |                                                           |

| <b>Study Reference</b>        | <b>Outcome</b> | <b>PM<sub>2.5</sub> Combustion Type</b> | <b>Logarithm of RR/<math>\mu\text{g}/\text{m}^3</math></b> | <b>Standard Error</b> | <b>PM<sub>2.5</sub> Concentration Used to Evaluate RR</b> | <b>PM<sub>2.5</sub> Denominator Concentration</b> |
|-------------------------------|----------------|-----------------------------------------|------------------------------------------------------------|-----------------------|-----------------------------------------------------------|---------------------------------------------------|
| Wu et al. 1990                | LC             | SHS                                     | -0.23572                                                   | 0.124486              | 35                                                        |                                                   |
| Butler et al. 1998            | LC             | SHS                                     | 0.703098                                                   | 0.867882              | 35                                                        |                                                   |
| Cardenas et al. 1997          | LC             | SHS                                     | 0.182322                                                   | 0.20687               | 35                                                        |                                                   |
| Garfunkel et al. 1985         | LC             | SHS                                     | 0.182322                                                   | 0.192289              | 35                                                        |                                                   |
| Hirayama 1981                 | LC             | SHS                                     | 0.336472                                                   | 0.176823              | 35                                                        |                                                   |
| Hole et al. 1989              | LC             | SHS                                     | 0.693147                                                   | 1.128787              | 35                                                        |                                                   |
| Johnson et al. 2001           | LC             | SHS                                     | 0.48858                                                    | 0.376507              | 35                                                        |                                                   |
| Wang et al. 2000              | LC             | SHS                                     | 0.173953                                                   | 0.267812              | 35                                                        |                                                   |
| Seow et al. 2002              | LC             | SHS                                     | 0.262364                                                   | 0.176823              | 35                                                        |                                                   |
| Smith et al. 2014             | LC             | HAP                                     | 0.231112                                                   | 0.096809              | 200                                                       | 45.5                                              |
| Smith et al. 2014             | LC             | HAP                                     | 0.593                                                      | 0.268                 | 330                                                       | 70                                                |
| Pope et al. 2011              | LC             | AS                                      | 2.345645                                                   | 0.182696              | 1000                                                      |                                                   |
| Pope et al. 2011              | LC             | AS                                      | 2.083185                                                   | 0.158627              | 3667                                                      |                                                   |
| Pope et al. 2011              | LC             | AS                                      | 2.453588                                                   | 0.102988              | 6667                                                      |                                                   |
| Pope et al. 2011              | LC             | AS                                      | 2.634045                                                   | 0.118683              | 10000                                                     |                                                   |
| Pope et al. 2011              | LC             | AS                                      | 2.989714                                                   | 0.075685              | 13333                                                     |                                                   |
| Pope et al. 2011              | LC             | AS                                      | 3.170526                                                   | 0.120746              | 16667                                                     |                                                   |
| Pope et al. 2011              | LC             | AS                                      | 3.289148                                                   | 0.088681              | 20000                                                     |                                                   |
| Pope et al. 2011              | LC             | AS                                      | 3.285412                                                   | 0.185462              | 23333                                                     |                                                   |
| Pope et al. 2011              | LC             | AS                                      | 3.42198                                                    | 0.087763              | 26667                                                     |                                                   |
| Pope et al. 2011              | LC             | AS                                      | 3.667656                                                   | 0.117077              | 30000                                                     |                                                   |
| Brauer et al. (2002)          | ALRI           | AAP                                     | 0.012257                                                   | 0.030595              | 16.9                                                      |                                                   |
| Hertz-Picciotto et al. (2007) | ALRI           | AAP                                     | 0.010495                                                   | 0.003981              | 22.3                                                      |                                                   |
| Karr et al. (2007)            | ALRI           | AAP                                     | 0.008618                                                   | 0.002288              | 25                                                        |                                                   |
| Karr et al. (2009)            | ALRI           | AAP                                     | 0.003922                                                   | 0.010991              | 12.1                                                      |                                                   |
| Blizzard et al. 2003          | ALRI           | SHS                                     | 0.463734                                                   | 0.147312              | 50                                                        |                                                   |
| Bonu et al. 2004              | ALRI           | SHS                                     | 0.139762                                                   | 0.075314              | 50                                                        |                                                   |
| Etiler et al. 2002            | ALRI           | SHS                                     | 0.067659                                                   | 0.148168              | 50                                                        |                                                   |
| Kristensen et al. 2006        | ALRI           | SHS                                     | 0.371564                                                   | 0.14942               | 50                                                        |                                                   |
| Baker et al. 2006             | ALRI           | SHS                                     | 0.254642                                                   | 0.12521               | 50                                                        |                                                   |
| Broor et al. 2001             | ALRI           | SHS                                     | -1.7148                                                    | 1.064895              | 50                                                        |                                                   |
| Chen et al. 1994              | ALRI           | SHS                                     | 0.398776                                                   | 0.174405              | 50                                                        |                                                   |

| <b>Study Reference</b> | <b>Outcome</b> | <b>PM<sub>2.5</sub><br/>Combustion<br/>Type</b> | <b>Logarithm<br/>of<br/>RR/<math>\mu\text{g}/\text{m}^3</math></b> | <b>Standard<br/>Error</b> | <b>PM<sub>2.5</sub><br/>Concentration<br/>Used to<br/>Evaluate RR</b> | <b>PM<sub>2.5</sub><br/>Denominator<br/>Concentration</b> |
|------------------------|----------------|-------------------------------------------------|--------------------------------------------------------------------|---------------------------|-----------------------------------------------------------------------|-----------------------------------------------------------|
| Duijts et al. 2008     | ALRI           | SHS                                             | -0.19845                                                           | 0.274887                  | 50                                                                    |                                                           |
| Ekwo et al. 1983       | ALRI           | SHS                                             | 0.737164                                                           | 0.317623                  | 50                                                                    |                                                           |
| Ferris et al. 1985     | ALRI           | SHS                                             | 0.615186                                                           | 0.087697                  | 50                                                                    |                                                           |
| Forastiere et al. 1992 | ALRI           | SHS                                             | 0.277632                                                           | 0.112884                  | 50                                                                    |                                                           |
| Gardner et al. 1984    | ALRI           | SHS                                             | 0.223144                                                           | 0.22149                   | 50                                                                    |                                                           |
| Kock et al. 2003       | ALRI           | SHS                                             | 0.756122                                                           | 0.248502                  | 50                                                                    |                                                           |
| Margolis et al. 1997   | ALRI           | SHS                                             | 0.336472                                                           | 0.207783                  | 50                                                                    |                                                           |
| Nuesslein et al. 1999  | ALRI           | SHS                                             | 0.076961                                                           | 0.941041                  | 50                                                                    |                                                           |
| Ogston et al. 1985     | ALRI           | SHS                                             | 0.662688                                                           | 0.368793                  | 50                                                                    |                                                           |
| Ogston et al. 1987     | ALRI           | SHS                                             | 0.518794                                                           | 0.115821                  | 50                                                                    |                                                           |
| Pedreira et al. 1985   | ALRI           | SHS                                             | 0.239017                                                           | 0.13706                   | 50                                                                    |                                                           |
| Rylander et al. 1995   | ALRI           | SHS                                             | 0.774727                                                           | 0.257175                  | 50                                                                    |                                                           |
| Taylor et al. 1987     | ALRI           | SHS                                             | 0.378436                                                           | 0.104149                  | 50                                                                    |                                                           |
| Hassan et al. 2001     | ALRI           | SHS                                             | 0.770108                                                           | 0.213568                  | 50                                                                    |                                                           |
| Suzuki et al. 2009     | ALRI           | SHS                                             | 0.438255                                                           | 0.109485                  | 50                                                                    |                                                           |
| Victoria et al. 1994   | ALRI           | SHS                                             | -0.06188                                                           | 0.134529                  | 50                                                                    |                                                           |
| Smith et al. 2011      | ALRI           | HAP                                             | 0.268264                                                           | 0.447947                  | 79                                                                    | 49                                                        |
| Smith et al. 2011      | ALRI           | HAP                                             | 0.589684                                                           | 0.325059                  | 103                                                                   | 49                                                        |
| Smith et al. 2011      | ALRI           | HAP                                             | 0.334639                                                           | 0.329612                  | 131                                                                   | 49                                                        |
| Smith et al. 2011      | ALRI           | HAP                                             | 0.41961                                                            | 0.364845                  | 163                                                                   | 49                                                        |
| Smith et al. 2011      | ALRI           | HAP                                             | 0.610787                                                           | 0.327824                  | 197                                                                   | 49                                                        |
| Smith et al. 2011      | ALRI           | HAP                                             | 0.682406                                                           | 0.312955                  | 230                                                                   | 49                                                        |
| Smith et al. 2011      | ALRI           | HAP                                             | 0.718465                                                           | 0.345909                  | 282                                                                   | 49                                                        |
| Smith et al. 2011      | ALRI           | HAP                                             | 0.575364                                                           | 0.397693                  | 363                                                                   | 49                                                        |
| Smith et al. 2011      | ALRI           | HAP                                             | 0.753269                                                           | 0.325687                  | 553                                                                   | 49                                                        |
| Smith et al. 2011      | ALRI           | HAP                                             | 0.32142                                                            | 0.436931                  | 103                                                                   | 79                                                        |
| Smith et al. 2011      | ALRI           | HAP                                             | 0.066375                                                           | 0.431997                  | 131                                                                   | 79                                                        |
| Smith et al. 2011      | ALRI           | HAP                                             | 0.151346                                                           | 0.455861                  | 163                                                                   | 79                                                        |
| Smith et al. 2011      | ALRI           | HAP                                             | 0.342523                                                           | 0.433673                  | 197                                                                   | 79                                                        |
| Smith et al. 2011      | ALRI           | HAP                                             | 0.414142                                                           | 0.426658                  | 230                                                                   | 79                                                        |
| Smith et al. 2011      | ALRI           | HAP                                             | 0.450201                                                           | 0.436423                  | 282                                                                   | 79                                                        |
| Smith et al. 2011      | ALRI           | HAP                                             | 0.3071                                                             | 0.485299                  | 363                                                                   | 79                                                        |

| <b>Study Reference</b> | <b>Outcome</b> | <b>PM<sub>2.5</sub><br/>Combustion<br/>Type</b> | <b>Logarithm<br/>of<br/>RR/<math>\mu\text{g}/\text{m}^3</math></b> | <b>Standard<br/>Error</b> | <b>PM<sub>2.5</sub><br/>Concentration<br/>Used to<br/>Evaluate RR</b> | <b>PM<sub>2.5</sub><br/>Denominator<br/>Concentration</b> |
|------------------------|----------------|-------------------------------------------------|--------------------------------------------------------------------|---------------------------|-----------------------------------------------------------------------|-----------------------------------------------------------|
| Smith et al. 2011      | ALRI           | HAP                                             | 0.485005                                                           | 0.444977                  | 553                                                                   | 79                                                        |
| Smith et al. 2011      | ALRI           | HAP                                             | -0.25505                                                           | 0.333622                  | 131                                                                   | 103                                                       |
| Smith et al. 2011      | ALRI           | HAP                                             | -0.17007                                                           | 0.343254                  | 163                                                                   | 103                                                       |
| Smith et al. 2011      | ALRI           | HAP                                             | 0.021103                                                           | 0.307069                  | 197                                                                   | 103                                                       |
| Smith et al. 2011      | ALRI           | HAP                                             | 0.092722                                                           | 0.312731                  | 230                                                                   | 103                                                       |
| Smith et al. 2011      | ALRI           | HAP                                             | 0.128781                                                           | 0.327205                  | 282                                                                   | 103                                                       |
| Smith et al. 2011      | ALRI           | HAP                                             | -0.01432                                                           | 0.373858                  | 363                                                                   | 103                                                       |
| Smith et al. 2011      | ALRI           | HAP                                             | 0.163585                                                           | 0.317819                  | 553                                                                   | 103                                                       |
| Smith et al. 2011      | ALRI           | HAP                                             | 0.084971                                                           | 0.343366                  | 163                                                                   | 131                                                       |
| Smith et al. 2011      | ALRI           | HAP                                             | 0.276148                                                           | 0.306331                  | 197                                                                   | 131                                                       |
| Smith et al. 2011      | ALRI           | HAP                                             | 0.347767                                                           | 0.312737                  | 230                                                                   | 131                                                       |
| Smith et al. 2011      | ALRI           | HAP                                             | 0.383826                                                           | 0.350659                  | 282                                                                   | 131                                                       |
| Smith et al. 2011      | ALRI           | HAP                                             | 0.240725                                                           | 0.382238                  | 363                                                                   | 131                                                       |
| Smith et al. 2011      | ALRI           | HAP                                             | 0.41863                                                            | 0.323761                  | 553                                                                   | 131                                                       |
| Smith et al. 2011      | ALRI           | HAP                                             | 0.191177                                                           | 0.329942                  | 197                                                                   | 163                                                       |
| Smith et al. 2011      | ALRI           | HAP                                             | 0.262796                                                           | 0.337799                  | 230                                                                   | 163                                                       |
| Smith et al. 2011      | ALRI           | HAP                                             | 0.298855                                                           | 0.373284                  | 282                                                                   | 163                                                       |
| Smith et al. 2011      | ALRI           | HAP                                             | 0.155755                                                           | 0.399347                  | 363                                                                   | 163                                                       |
| Smith et al. 2011      | ALRI           | HAP                                             | 0.333659                                                           | 0.351879                  | 553                                                                   | 163                                                       |
| Smith et al. 2011      | ALRI           | HAP                                             | 0.071619                                                           | 0.289433                  | 230                                                                   | 197                                                       |
| Smith et al. 2011      | ALRI           | HAP                                             | 0.107678                                                           | 0.322166                  | 282                                                                   | 197                                                       |
| Smith et al. 2011      | ALRI           | HAP                                             | -0.03542                                                           | 0.355146                  | 363                                                                   | 197                                                       |
| Smith et al. 2011      | ALRI           | HAP                                             | 0.142482                                                           | 0.312631                  | 553                                                                   | 197                                                       |
| Smith et al. 2011      | ALRI           | HAP                                             | 0.036059                                                           | 0.334963                  | 282                                                                   | 230                                                       |
| Smith et al. 2011      | ALRI           | HAP                                             | -0.10704                                                           | 0.377171                  | 363                                                                   | 230                                                       |
| Smith et al. 2011      | ALRI           | HAP                                             | 0.070863                                                           | 0.3172                    | 553                                                                   | 230                                                       |
| Smith et al. 2011      | ALRI           | HAP                                             | -0.1431                                                            | 0.398081                  | 363                                                                   | 282                                                       |
| Smith et al. 2011      | ALRI           | HAP                                             | 0.034804                                                           | 0.336203                  | 553                                                                   | 282                                                       |
| Smith et al. 2011      | ALRI           | HAP                                             | 0.177905                                                           | 0.386069                  | 553                                                                   | 363                                                       |



## Sensitivity of RRs and PAFs to model form

We considered seven alternative RR models that have been suggested in the literature or variations on these previous examined forms. The first alternative risk model assumes a linear increase in RR up to 50  $\mu\text{g}/\text{m}^3$  and no change in RR above this level. This model was used by Cohen et al. (2004) to estimate the burden of disease from cardiopulmonary mortality due to outdoor urban air pollution exposures in 2000 (WHO 2002):

$$\begin{aligned} \text{for } z < z_{cf}, RR_{Lin50}(z) &= 1, \\ \text{for } z_{cf} < z \leq 50, RR_{Lin50}(z) &= 1 + \gamma(z - z_{cf}), \text{ and} \\ \text{for } z > 50, RR_{Lin50}(z) &= 1 + \gamma(50 - z_{cf}). \end{aligned} \quad [1]$$

The second model form assumes a linear increase in RR up to 30  $\mu\text{g}/\text{m}^3$  as this concentration is the highest value reported in any of the AAP cohort studies:

$$\begin{aligned} \text{for } z < z_{cf}, RR_{Lin30}(z) &= 1, \\ \text{for } z_{cf} < z \leq 30, RR_{Lin30}(z) &= 1 + \gamma(z - z_{cf}), \text{ and} \\ \text{for } z > 30, RR_{Lin30}(z) &= 1 + \gamma(30 - z_{cf}). \end{aligned} \quad [2]$$

The third model assumes that the RR increases as the logarithm of  $\text{PM}_{2.5}$  exposure on the exponential scale (Cohen et al. 2004; Ostro 2004):

$$\begin{aligned} \text{for } z < z_{cf}, RR_{Log}(z) &= 1, \\ \text{for } z \geq z_{cf}, RR_{Log}(z) &= [(z + 1) / (z_{cf} + 1)]^\rho. \end{aligned} \quad [3]$$

This model can be made more flexible by adding an additional parameter,  $\phi$ , which alters the rate of increase of the risk function at low concentrations:

$$\begin{aligned} \text{for } z < z_{cf}, RR_{Log2}(z) &= 1, \\ \text{for } z \geq z_{cf}, RR_{Log2}(z) &= [(z + \phi) / (z_{cf} + \phi)]^p. \end{aligned} \quad [4]$$

The fifth model assumes a power function form proposed by Pope et al. (2009, 2011):

$$\begin{aligned} \text{for } z < z_{cf}, RR_{Power}(z) &= 1, \\ \text{for } z \geq z_{cf}, RR_{Power}(z) &= 1 + \theta(z - z_{cf})^\eta. \end{aligned} \quad [5]$$

The sixth model considered is a linear model:

$$\begin{aligned} \text{for } z < z_{cf}, RR_{Linear}(z) &= 1, \\ \text{for } z \geq z_{cf}, RR_{Linear}(z) &= 1 + \tau(z - z_{cf}). \end{aligned} \quad [6]$$

The seventh and final alternative model is the  $RR_{IER}$  model with the power of concentration  $\delta$  set to unity and thus has the form:

$$\begin{aligned} \text{for } z < z_{cf}, RR_{Exp}(z) &= 1 \\ \text{for } z \geq z_{cf}, RR_{Exp}(z) &= 1 + \alpha\{1 - \exp[-\gamma(z - z_{cf})]\}. \end{aligned} \quad [7]$$

Predicted RRs and CIs from the seven alternative model forms examined are presented in Figures S1-S7 for the four causes of death and in Figures S8-S14 for ALRI. We calculated both the Akaike (AIC) and Bayesian (BIC) Information Criteria for each of the eight models

examined as a measure of goodness-of-fit of the various forms of risk models. These measures include different penalties for the number of estimated parameters. These values are presented in Table S2 with smaller (or larger negative) values indicating better fit. The  $RR_{IER}$  model returned the lowest AIC and BIC of the eight models considered for four of the five outcomes examined (Table S1). Only for COPD was the IER model not the best fit. The *Log2* model provided a slightly better fit by 0.4% for the AIC and 0.5% for the BIC compared the IER model (Table S1). The *Linear*, *Lin30*, and *Lin50* models clearly under/over predict the input RRs for various ranges of  $PM_{2.5}$  concentrations (Figurers S1-S14). The *Exp and Log* models tended to be the next best predictors. The *Power* and *Log2* models gave similar and generally superior predictions to the other model forms except for the IER model which was superior to all other models for four of the five outcomes examined and nearly as good with the fifth outcome (COPD). We conclude from this analyses that the single model form best predicting all five outcomes was the IER model.

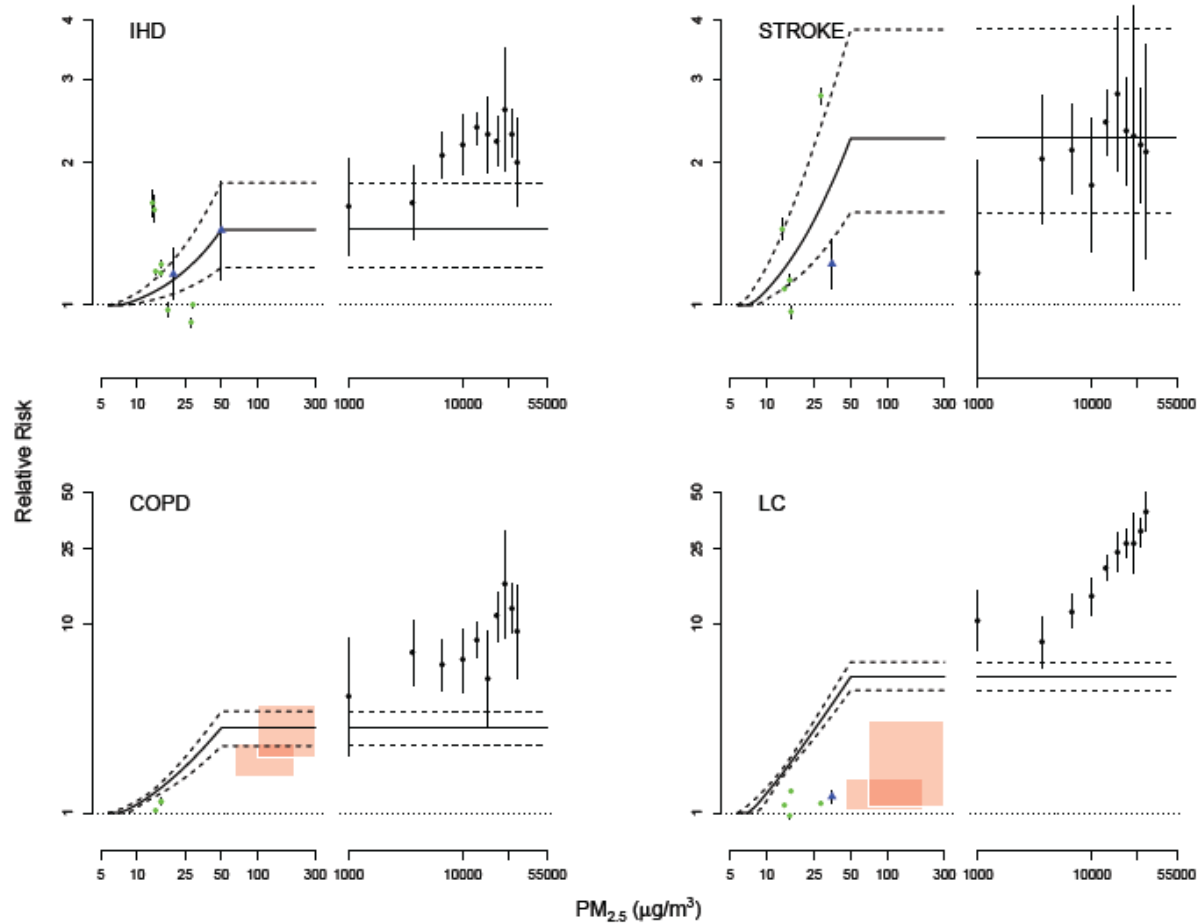

**Figure S1.** Predicted values of *Lin50* model (solid line) and 95% confidence interval (dashed line) for ischemic heart disease (IHD), stroke, chronic obstructive pulmonary disease (COPD), and lung cancer (LC) mortality. Type-specific relative risks (RR) (points) and 95% confidence intervals (error bars) also presented. Green dots represent AAP cohort study RRs, blue triangles represent pooled SHS RRs, and black dots represent AS RRs. Shaded boxes for COPD and LC mortality represent uncertainty (height) and exposure contrast (width) of RR HAP estimates for males and females separately.  $PM_{2.5}$  concentrations are on the logarithmic (base 10) scale on x-axis.

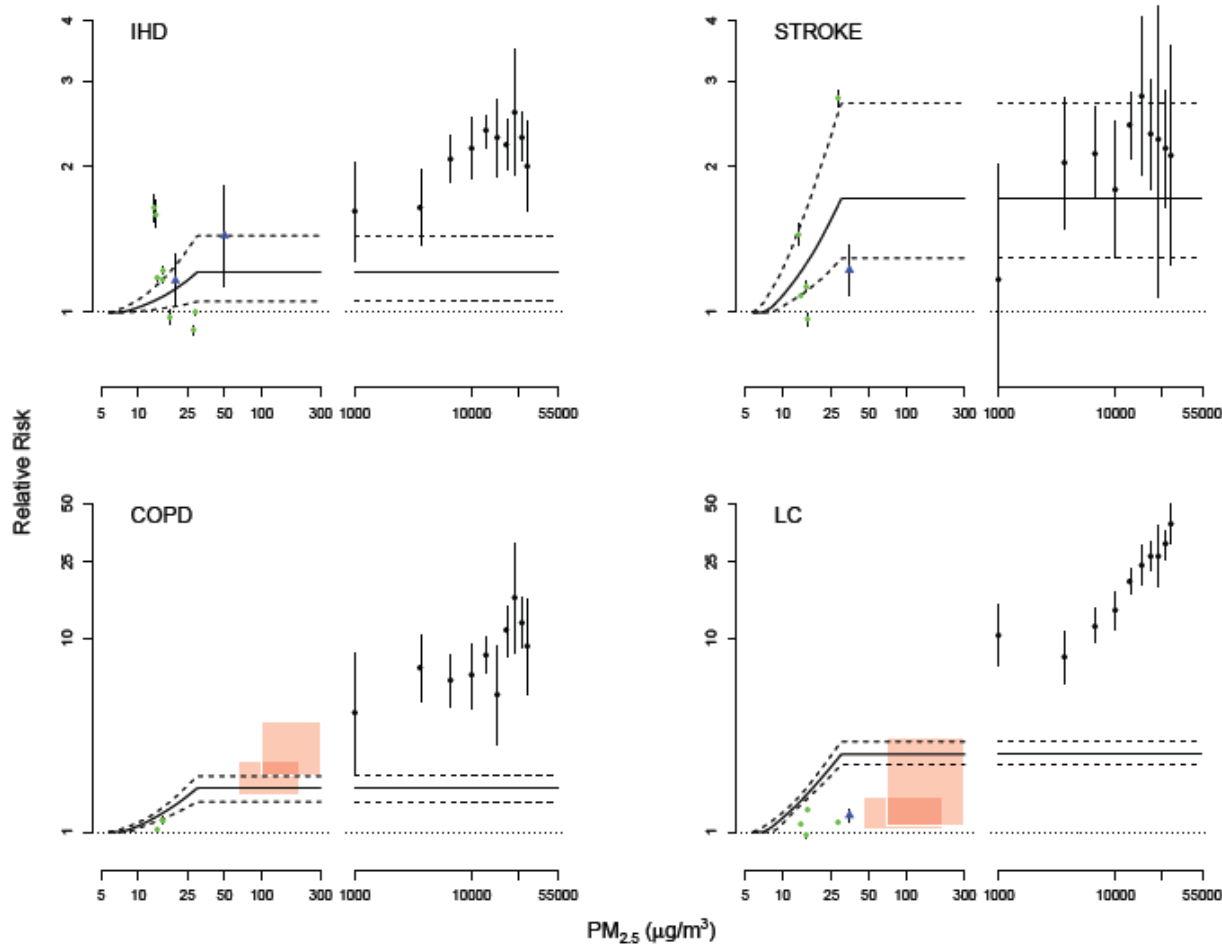

**Figure S2.** Predicted values of *Lin30* model (solid line) and 95% confidence interval (dashed line) for ischemic heart disease (IHD), stroke, chronic obstructive pulmonary disease (COPD), and lung cancer (LC) mortality. Type-specific relative risks (RR) (points) and 95% confidence intervals (error bars) also presented. Green dots represent AAP cohort study RRs, blue triangles represent pooled SHS RRs, and black dots represent AS RRs. Shaded boxes for COPD and LC mortality represent uncertainty (height) and exposure contrast (width) of RR HAP estimates for males and females separately.  $PM_{2.5}$  concentrations are on the logarithmic (base 10) scale on x-axis.

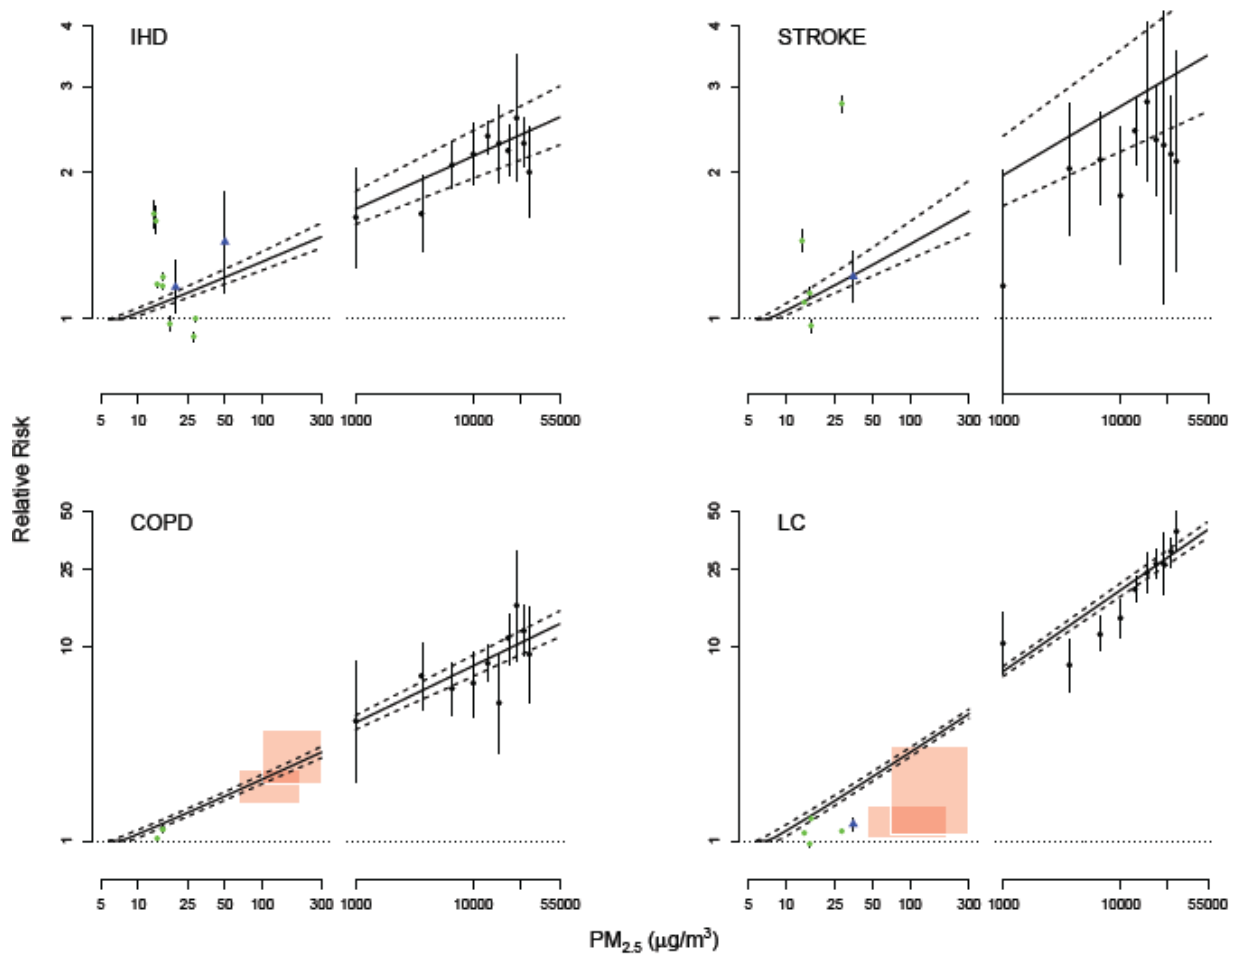

**Figure S3.** Predicted values of *Log* model (solid line) and 95% confidence interval (dashed line) for ischemic heart disease (IHD), stroke, chronic obstructive pulmonary disease (COPD), and lung cancer (LC) mortality. Type-specific relative risks (RR) (points) and 95% confidence intervals (error bars) also presented. Green dots represent AAP cohort study RRs, blue triangles represent pooled SHS RRs, and black dots represent AS RRs. Shaded boxes for COPD and LC mortality represent uncertainty (height) and exposure contrast (width) of RR HAP estimates for males and females separately. PM<sub>2.5</sub> concentrations are on the logarithmic (base 10) scale on x-axis.

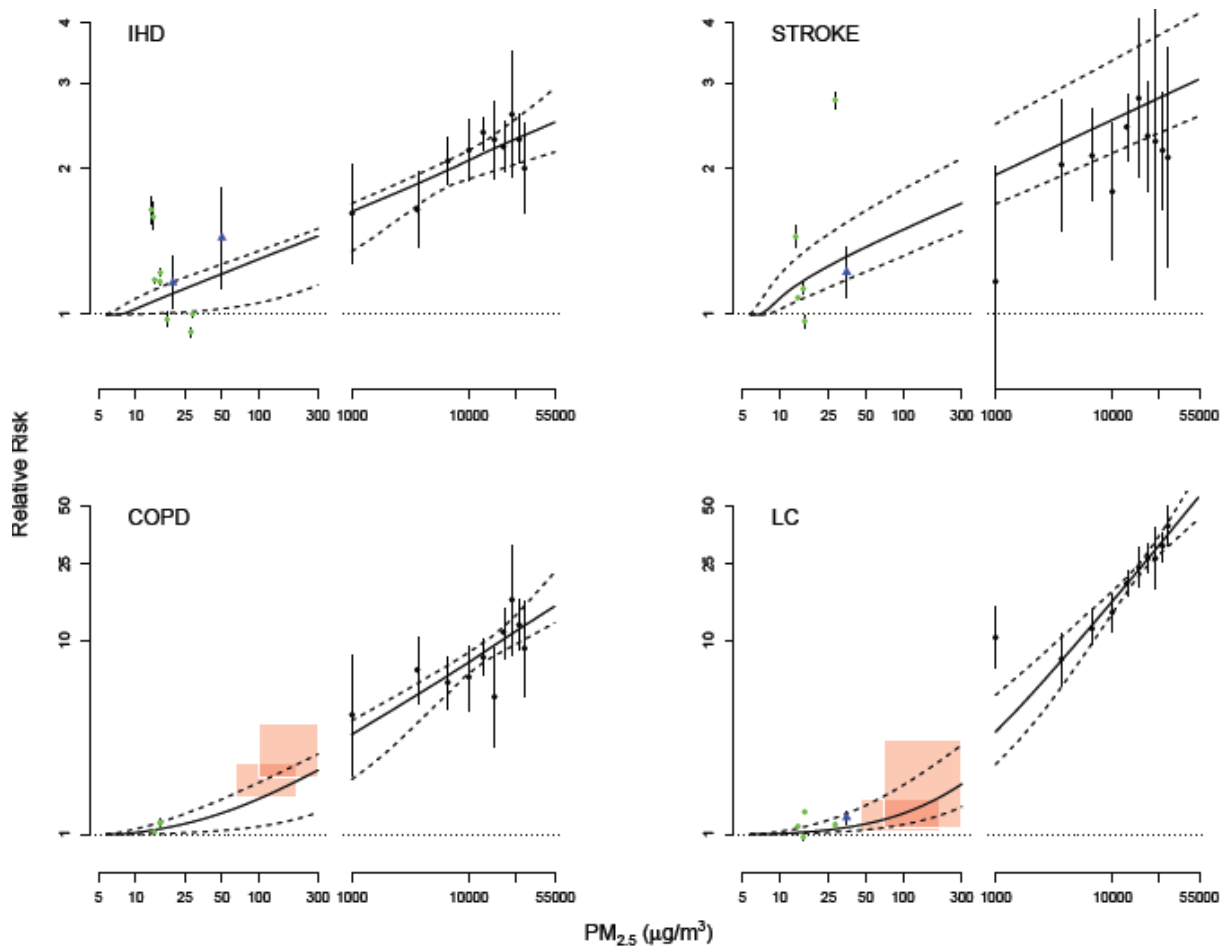

**Figure S4.** Predicted values of  $Log_2$  model (solid line) and 95% confidence interval (dashed line) for ischemic heart disease (IHD), stroke, chronic obstructive pulmonary disease (COPD), and lung cancer (LC) mortality. Type-specific relative risks (RR) (points) and 95% confidence intervals (error bars) also presented. Green dots represent AAP cohort study RRs, blue triangles represent pooled SHS RRs, and black dots represent AS RRs. Shaded boxes for COPD and LC mortality represent uncertainty (height) and exposure contrast (width) of RR HAP estimates for males and females separately.  $PM_{2.5}$  concentrations are on the logarithmic (base 10) scale on x-axis.

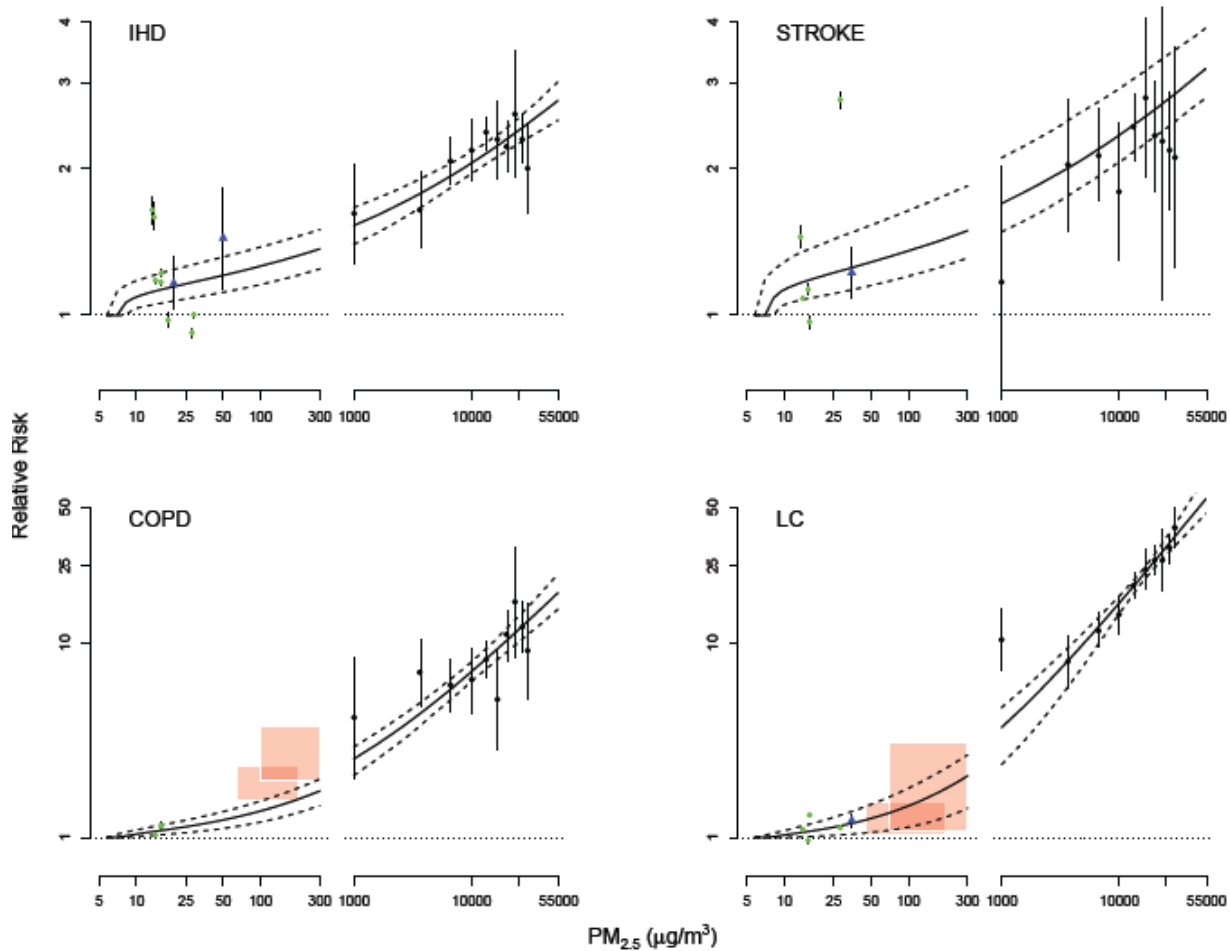

**Figure S5.** Predicted values of *Power* model (solid line) and 95% confidence interval (dashed line) for ischemic heart disease (IHD), stroke, chronic obstructive pulmonary disease (COPD), and lung cancer (LC) mortality. Type-specific relative risks (RR) (points) and 95% confidence intervals (error bars) also presented. Green dots represent AAP cohort study RRs, blue triangles represent pooled SHS RRs, and black dots represent AS RRs. Shaded boxes for COPD and LC mortality represent uncertainty (height) and exposure contrast (width) of RR HAP estimates for males and females separately.  $PM_{2.5}$  concentrations are on the logarithmic (base 10) scale on x-axis.



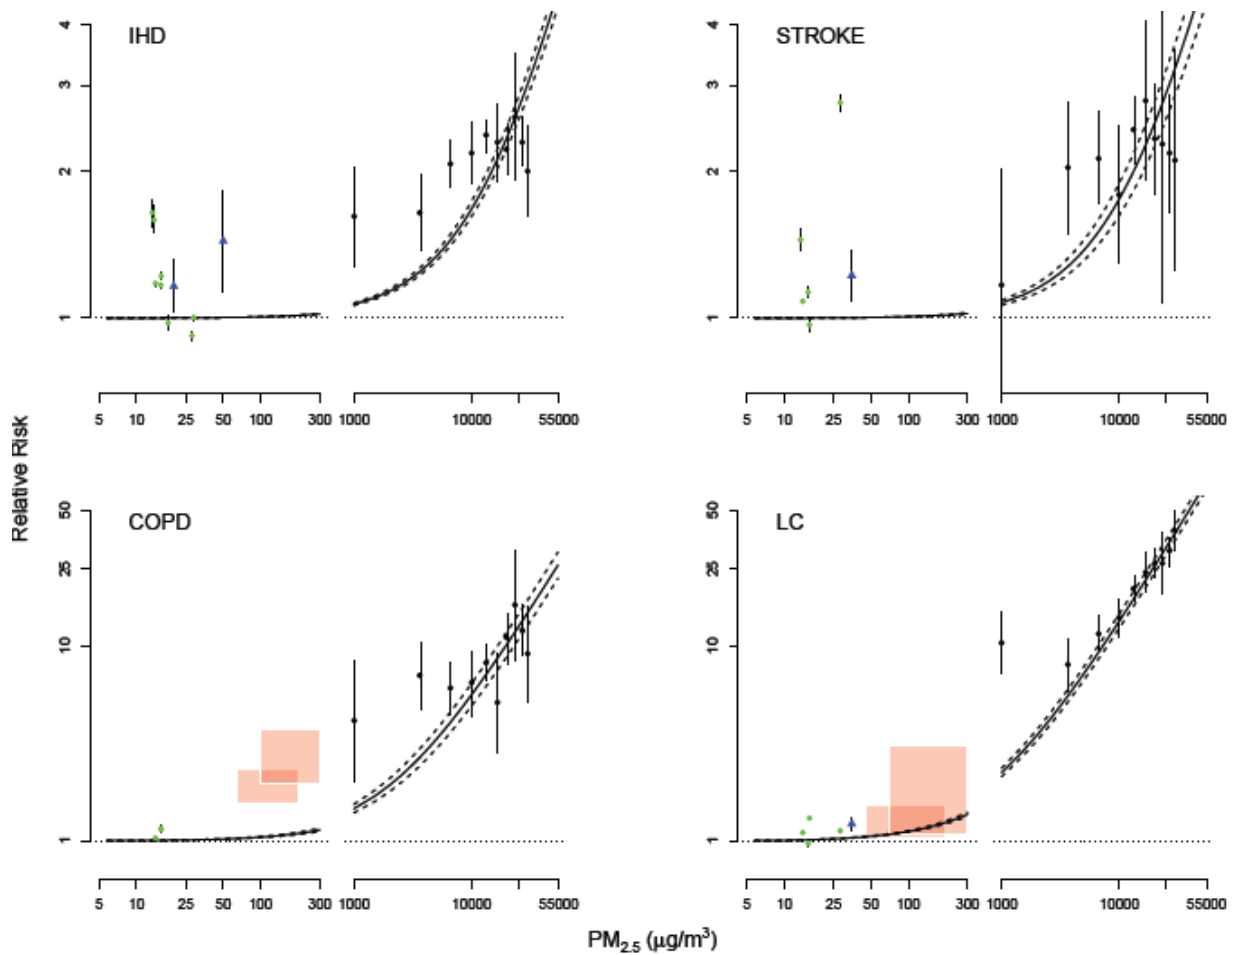

**Figure S6.** Predicted values of *Linear* model (solid line) and 95% confidence interval (dashed line) for ischemic heart disease (IHD), stroke, chronic obstructive pulmonary disease (COPD), and lung cancer (LC) mortality. Type-specific relative risks (RR) (points) and 95% confidence intervals (error bars) also presented. Green dots represent AAP cohort study RRs, blue triangles represent pooled SHS RRs, and black dots represent AS RRs. Shaded boxes for COPD and LC mortality represent uncertainty (height) and exposure contrast (width) of RR HAP estimates for males and females separately.  $PM_{2.5}$  concentrations are on the logarithmic (base 10) scale on x-axis.

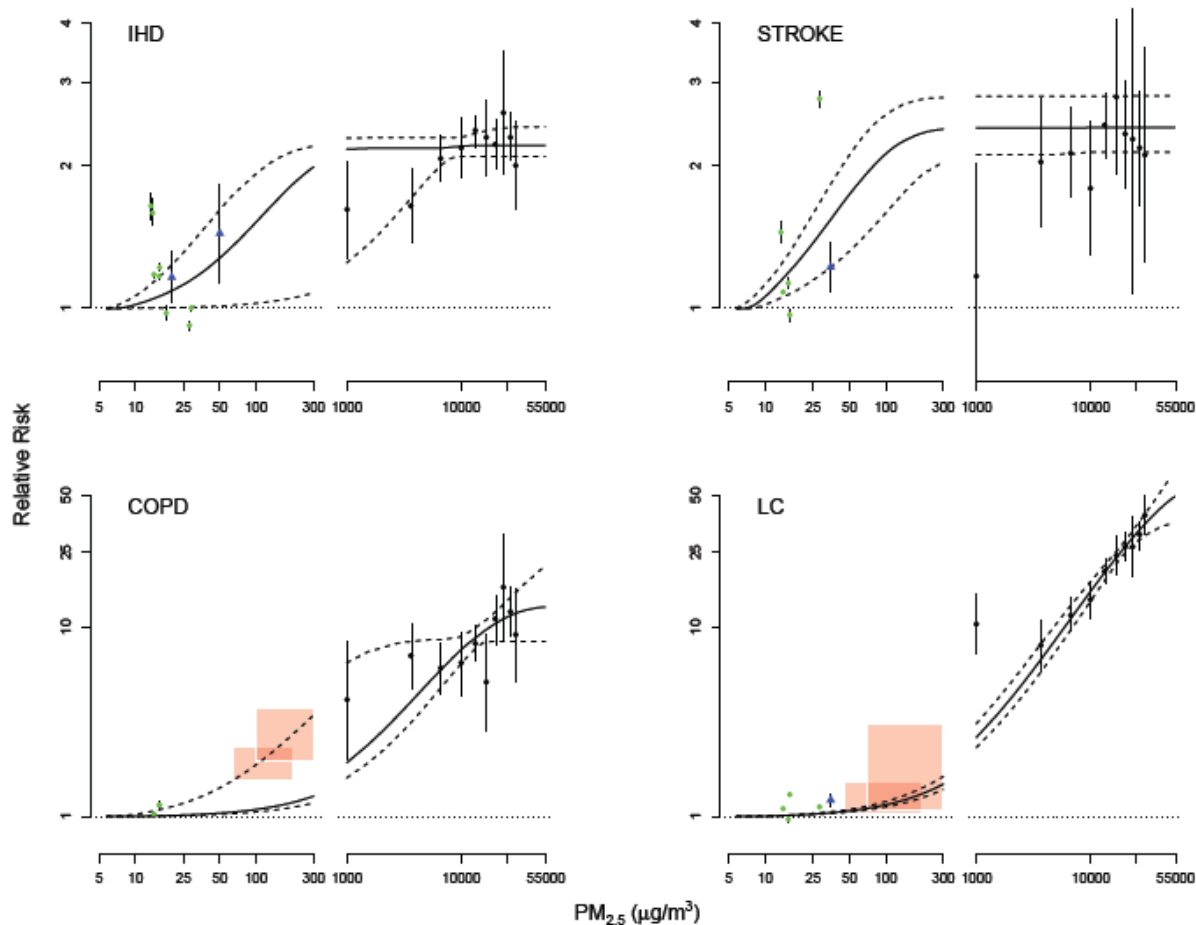

**Figure S7.** Predicted values of *Exp* model (solid line) and 95% confidence interval (dashed line) for ischemic heart disease (IHD), stroke, chronic obstructive pulmonary disease (COPD), and lung cancer (LC) mortality. Type-specific relative risks (RR) (points) and 95% confidence intervals (error bars) also presented. Green dots represent AAP cohort study RRs, blue triangles represent pooled SHS RRs, and black dots represent AS RRs. Shaded boxes for COPD and LC mortality represent uncertainty (height) and exposure contrast (width) of RR HAP estimates for males and females separately.  $PM_{2.5}$  concentrations are on the logarithmic (base 10) scale on x-axis.

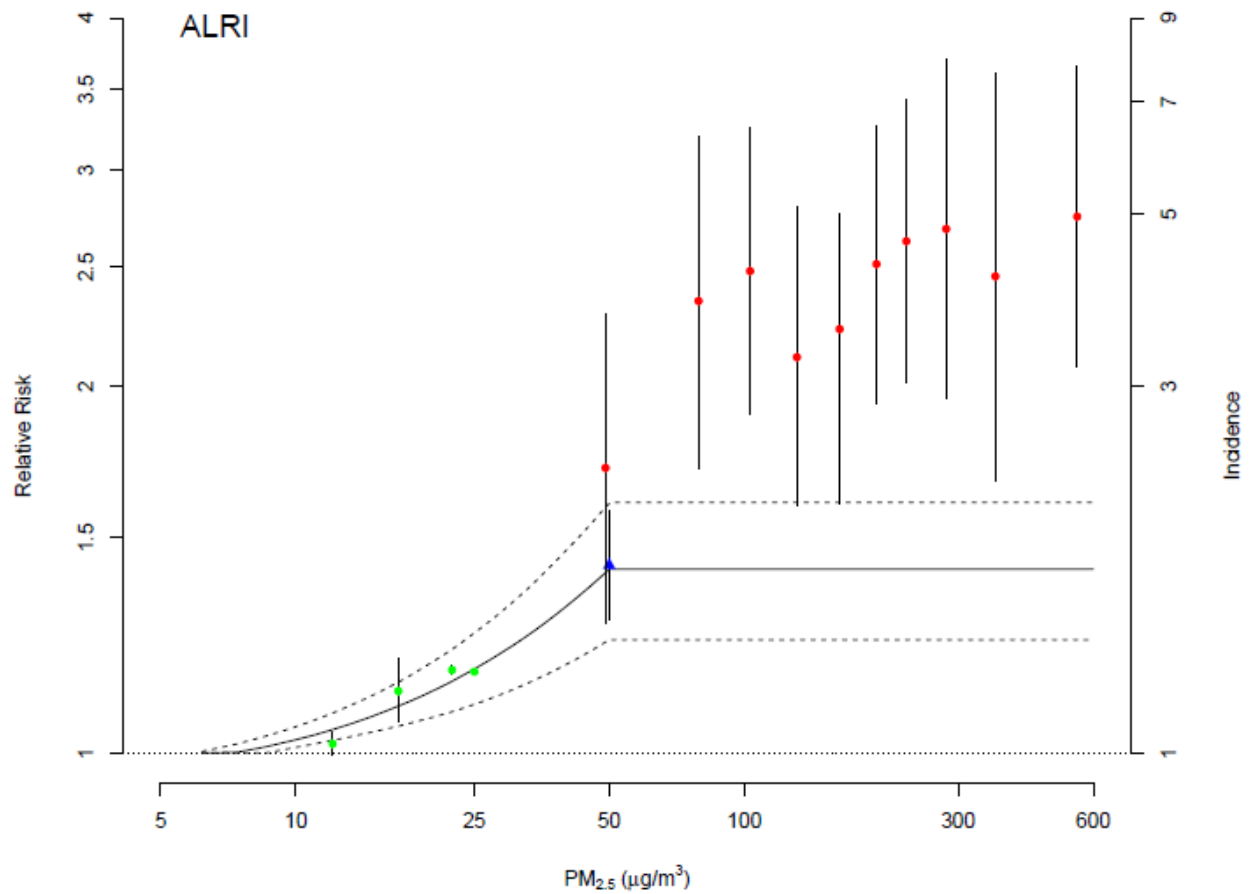

**Figure S8.** Predicted values of *Lin50* model (solid line) and 95% confidence interval (dashed line) for acute lower respiratory infection infants (ALRI). Type-specific relative risks (RR) (points) and 95% confidence intervals (error bars) also presented. Green dots represent AAP cohort study RRs, blue triangle represents pooled SHS RRs, and red dots represent household air pollution (HAP) RRs. Right hand y-axis represents HAP incidence rates. are PM<sub>2.5</sub> concentrations are on the logarithmic (base 10) scale on x-axis.

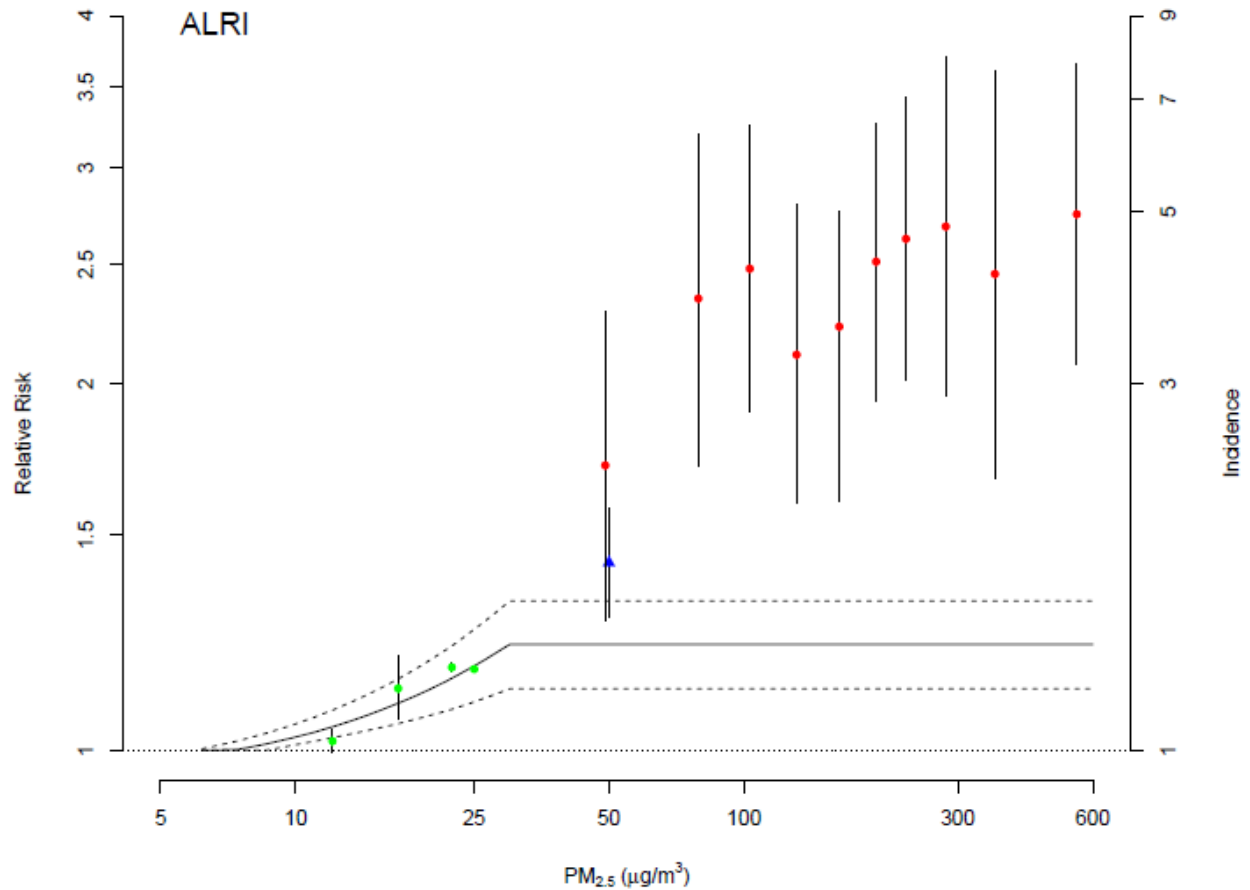

**Figure S9.** Predicted values of *Lin30* model (solid line) and 95% confidence interval (dashed line) for acute lower respiratory infection infants (ALRI). Type-specific relative risks (RR) (points) and 95% confidence intervals (error bars) also presented. Green dots represent AAP cohort study RRs, blue triangle represents pooled SHS RRs, and red dots represent household air pollution (HAP) RRs. Right hand y-axis represents HAP incidence rates.  $PM_{2.5}$  concentrations are on the logarithmic (base 10) scale on x-axis.

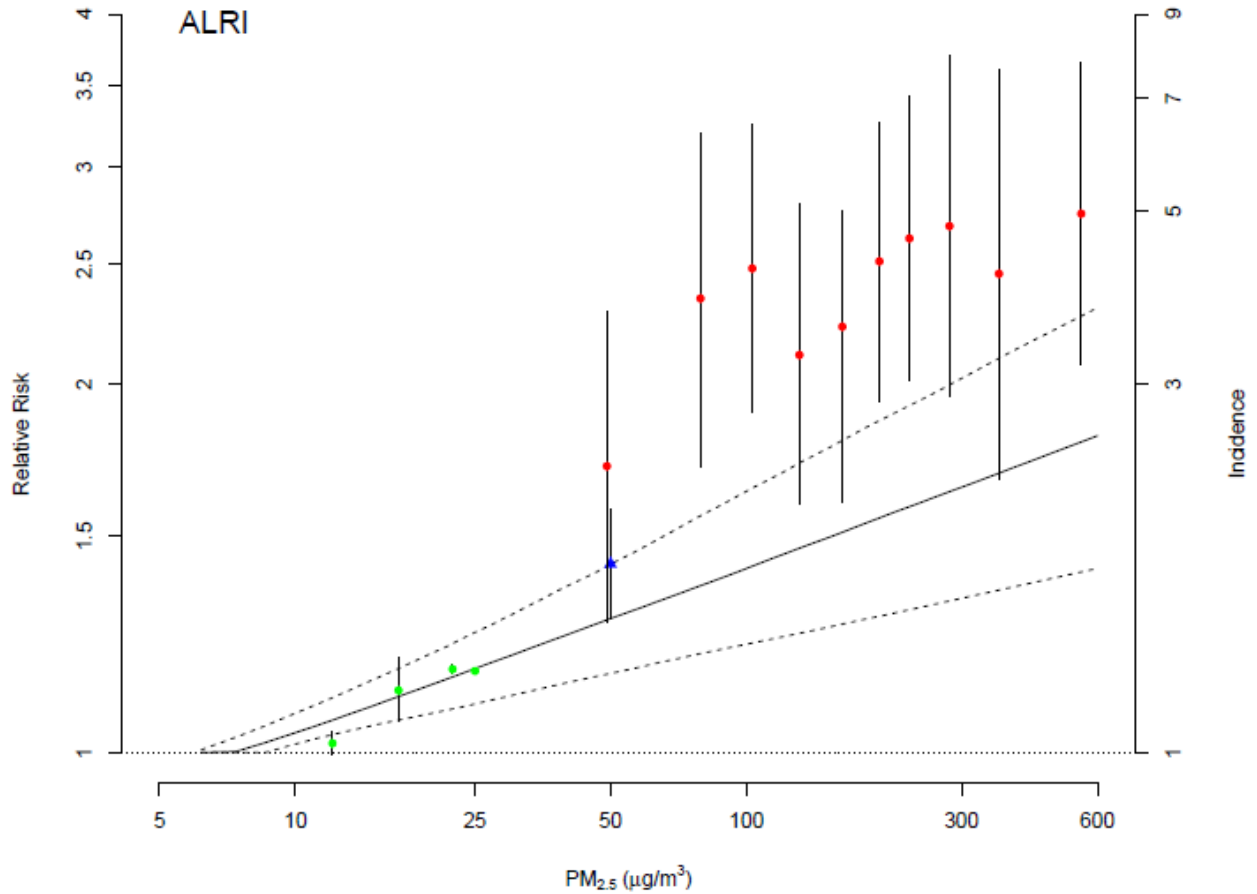

**Figure S10.** Predicted values of *Log* model (solid line) and 95% confidence interval (dashed line) for acute lower respiratory infection infants (ALRI). Type-specific relative risks (RR) (points) and 95% confidence intervals (error bars) also presented. Green dots represent AAP cohort study RRs, blue triangle represents pooled SHS RRs, and red dots represent household air pollution (HAP) RRs. Right hand y-axis represents HAP incidence rates. PM<sub>2.5</sub> concentrations are on the logarithmic (base 10) scale on x-axis.

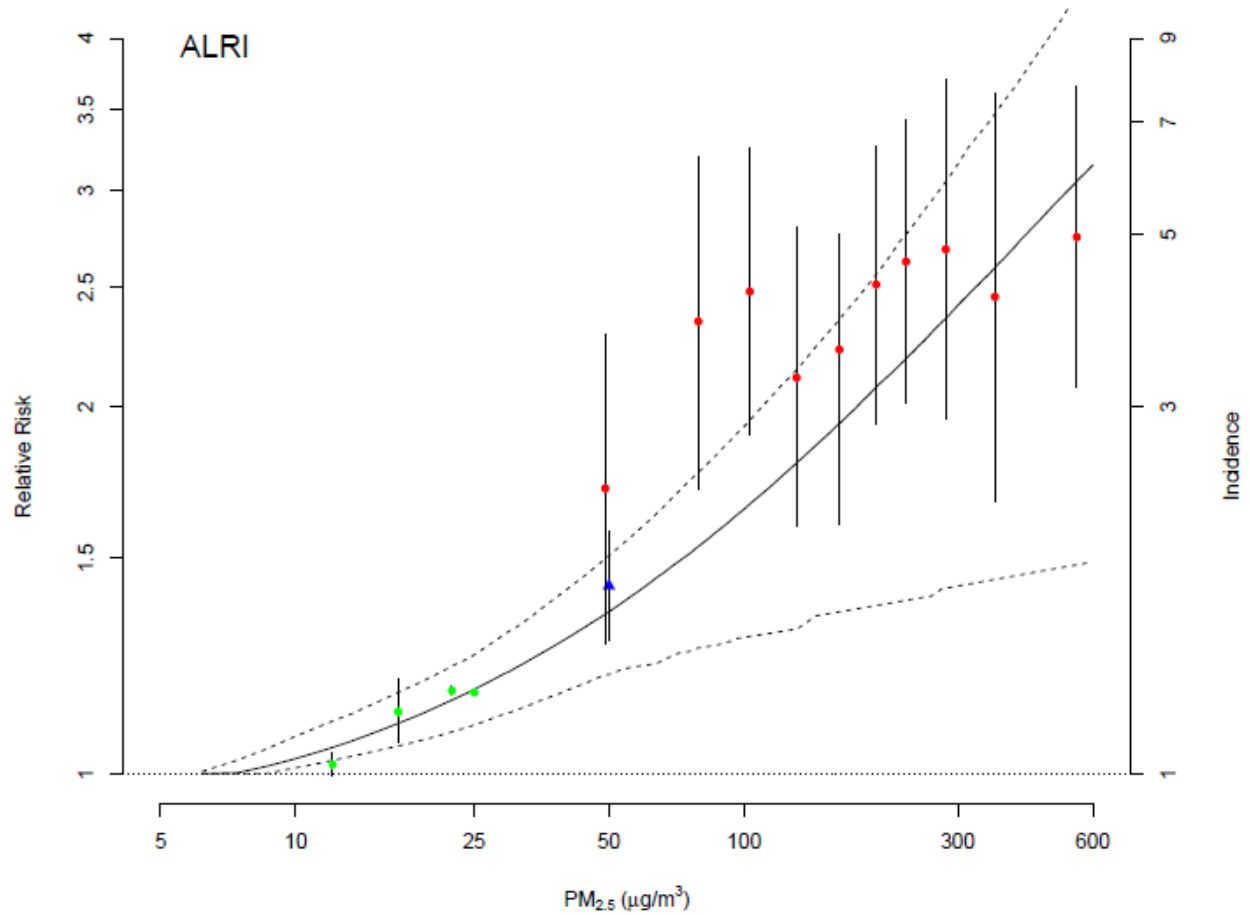

**Figure S11.** Predicted values of *Log2* model (solid line) and 95% confidence interval (dashed line) for acute lower respiratory infection infants (ALRI). Type-specific relative risks (RR) (points) and 95% confidence intervals (error bars) also presented. Green dots represent AAP cohort study RRs, blue triangle represents pooled SHS RRs, and red dots represent household air pollution (HAP) RRs. Right hand y-axis represents HAP incidence rates. PM<sub>2.5</sub> concentrations are on the logarithmic (base 10) scale on x-axis.

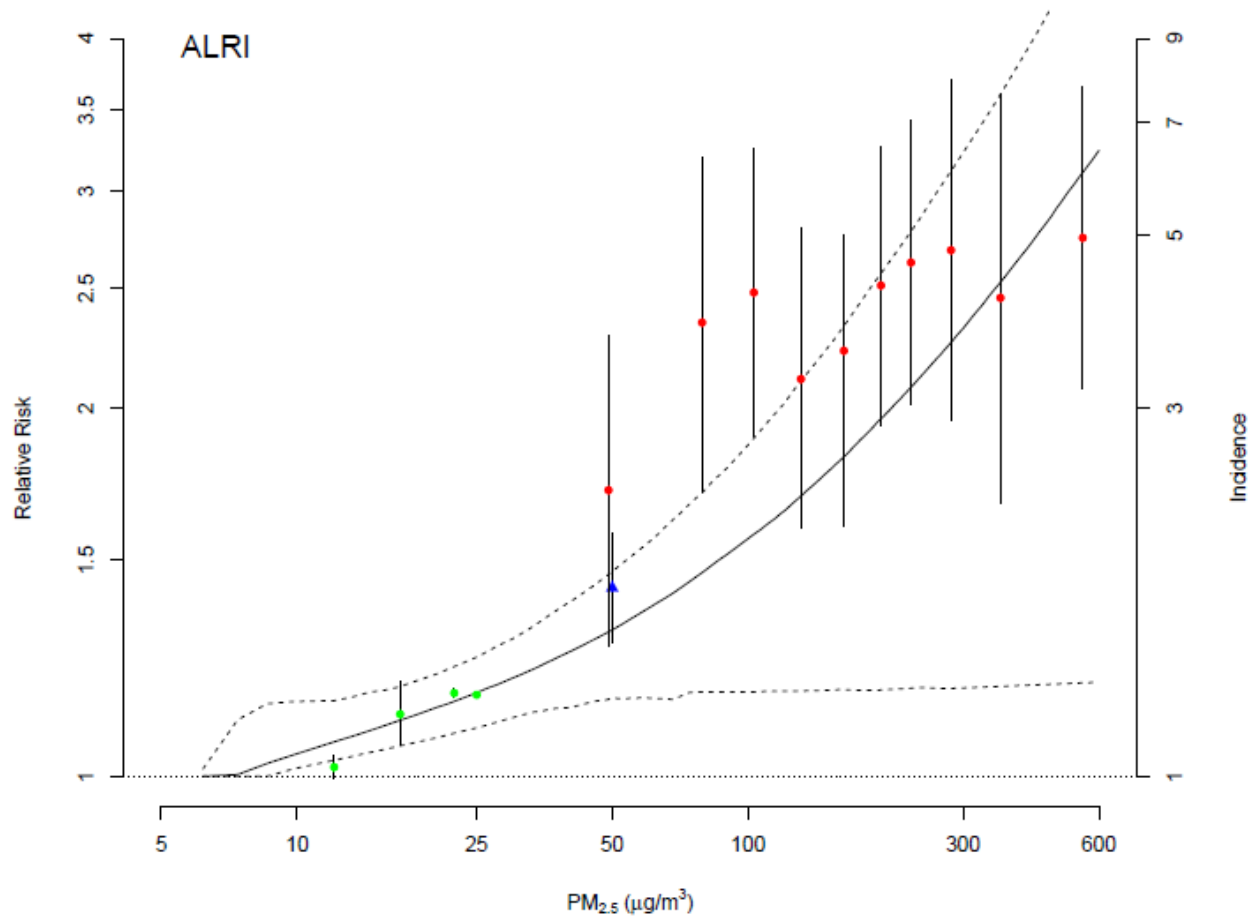

**Figure S12.** Predicted values of *Power* model (solid line) and 95% confidence interval (dashed line) for acute lower respiratory infection infants (ALRI). Type-specific relative risks (RR) (points) and 95% confidence intervals (error bars) also presented. Green dots represent AAP cohort study RRs, blue triangle represents pooled SHS RRs, and red dots represent household air pollution (HAP) RRs. Right hand y-axis represents HAP incidence rates. PM<sub>2.5</sub> concentrations are on the logarithmic (base 10) scale on x-axis.

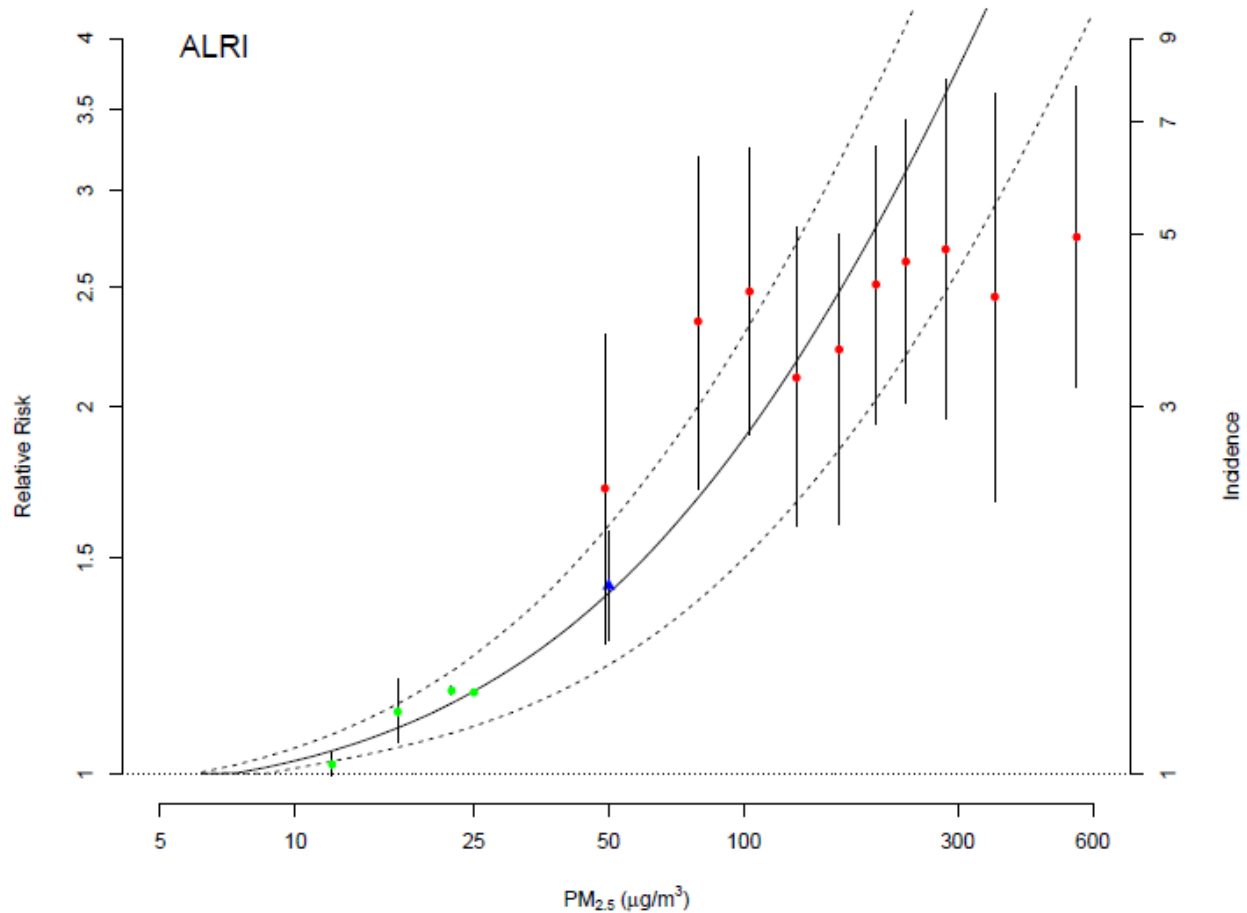

**Figure S13.** Predicted values of *Linear* model (solid line) and 95% confidence interval (dashed line) for acute lower respiratory infection infants (ALRI). Type-specific relative risks (RR) (points) and 95% confidence intervals (error bars) also presented. Green dots represent AAP cohort study RRs, blue triangle represents pooled SHS RRs, and red dots represent household air pollution (HAP) RRs. Right hand y-axis represents HAP incidence rates. PM<sub>2.5</sub> concentrations are on the logarithmic (base 10) scale on x-axis.



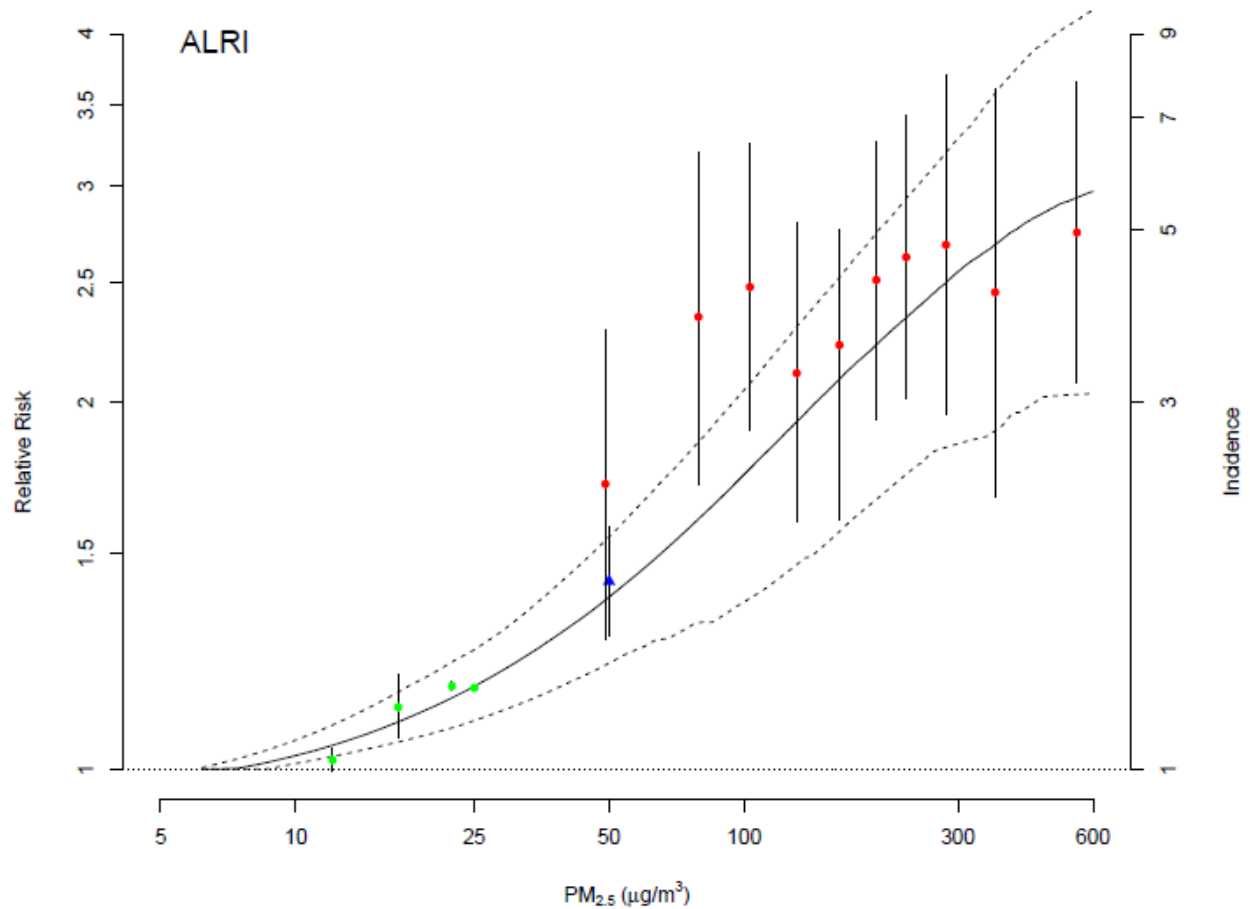

**Figure S14.** Predicted values of *Exp* model (solid line) and 95% confidence interval (dashed line) for acute lower respiratory infection infants (ALRI). Type-specific relative risks (RR) (points) and 95% confidence intervals (error bars) also presented. Green dots represent AAP cohort study RRs, blue triangle represents pooled SHS RRs, and red dots represent household air pollution (HAP) RRs. Right hand y-axis represents HAP incidence rates. PM<sub>2.5</sub> concentrations are on the logarithmic (base 10) scale on x-axis.

**Table S2.** AIC and BIC by outcome and model form.

| <b>Outcome</b> | <b>Model Form</b> | <b>AIC</b> | <b>BIC</b> |
|----------------|-------------------|------------|------------|
| LC             | Exp               | -10154.8   | -10150.6   |
| LC             | Power             | -10142.6   | -10138.4   |
| LC             | Log               | -10058.6   | -10056.5   |
| LC             | Lin               | -10151.6   | -10149.5   |
| LC             | Lin50             | -9926.08   | -9924      |
| LC             | IER               | -10250     | -10243.8   |
| LC             | Lin30             | -9978.5    | -9976.43   |
| LC             | Log2              | -10173.8   | -10169.6   |
| IHD            | Exp               | -4695.4    | -4692.35   |
| IHD            | Power             | -4719.88   | -4716.83   |
| IHD            | Log               | -4700.36   | -4698.84   |
| IHD            | Lin               | -4678.08   | -4676.56   |
| IHD            | Lin50             | -4698.39   | -4696.86   |
| IHD            | IER               | -4752.9    | -4748.32   |
| IHD            | Lin30             | -4698.01   | -4696.49   |
| IHD            | Log2              | -4697.99   | -4694.94   |
| STROKE         | Exp               | -4153.66   | -4150.55   |
| STROKE         | Power             | -4133.08   | -4129.97   |
| STROKE         | Log               | -4148.31   | -4146.76   |
| STROKE         | Lin               | -4124.57   | -4123.01   |
| STROKE         | Lin50             | -4128.61   | -4127.05   |
| STROKE         | IER               | -4221.2    | -4216.53   |
| STROKE         | Lin30             | -4123.09   | -4121.54   |
| STROKE         | Log2              | -4140.35   | -4137.24   |
| COPD           | Exp               | -741.901   | -740.485   |
| COPD           | Power             | -757.671   | -756.255   |
| COPD           | Log               | -707.757   | -707.049   |

| <b>Outcome</b> | <b>Model Form</b> | <b>AIC</b> | <b>BIC</b> |
|----------------|-------------------|------------|------------|
| COPD           | Lin               | -741.821   | -741.113   |
| COPD           | Lin50             | -692.504   | -691.796   |
| COPD           | IER               | -747.208   | -745.084   |
| COPD           | Lin30             | -704.453   | -703.744   |
| COPD           | Log2              | -749.581   | -748.165   |
| ALRI           | Exp               | -13894.9   | -13890.3   |
| ALRI           | Power             | -13906     | -13901.5   |
| ALRI           | Log               | -13893.4   | -13891.1   |
| ALRI           | Lin               | -13889.2   | -13886.9   |
| ALRI           | Lin50             | -13894.1   | -13891.8   |
| ALRI           | IER               | -13951     | -13944.2   |
| ALRI           | Lin30             | -13893     | -13890.7   |
| ALRI           | Log2              | -13915     | -13910.4   |

## Characterizing Uncertainty

We used a simulation approach to estimate uncertainty for both the risk function and PAF based on uncertainty in several components of the relative risk function and PAF.

### *Uncertainty in the estimates of $(\alpha, \beta, \delta)$*

We first determine the logarithm of the relative risk estimates  $\{\hat{r}_1^{(s)}, \dots, \hat{r}_{K_S}^{(s)}, s = 1, \dots, S\}$  denoted by  $\{\hat{\beta}_1^{(s)}, \dots, \hat{\beta}_{K_S}^{(s)}, s = 1, \dots, S\}$ . Further denote the standard error of  $\{\hat{\beta}_1^{(s)}, \dots, \hat{\beta}_{K_S}^{(s)}, s = 1, \dots, S\}$  by  $\{v_1^{(s)}, \dots, v_{K_S}^{(s)}, s = 1, \dots, S\}$ . We then generate 1000 realizations of the log-relative risks assuming a normal distribution with mean  $\{\hat{\beta}_1^{(s)}, \dots, \hat{\beta}_{K_S}^{(s)}, s = 1, \dots, S\}$  and standard deviation  $\{v_1^{(s)}, \dots, v_{K_S}^{(s)}, s = 1, \dots, S\}$  and take their exponents. One thousand estimates of  $(\alpha, \beta, \delta)$  are obtained for each set of simulated RRs. We have found in practice that in a small percentage of cases ( $< 5\%$ ) the estimation routine does not converge due to a set of simulated RR that are not consistent with the risk model form. We continue to simulate risks until 1000 estimates of  $(\alpha, \beta, \delta)$  are obtained.

### *Uncertainty in the exposure estimate of $PM_{2.5}$*

Estimates of  $PM_{2.5}$  and their associated uncertainty are described in detail by Brauer et al. (2011). In summary, the average of a satellite-based remote sensing estimate and an atmospheric model were constructed for each  $0.1^\circ$  by  $0.1^\circ$  grid. This summary estimate was calibrated to available ground based monitoring data. The estimate of uncertainty was obtained based on the residual error estimate of the calibration regression equation. Uncertainty in both the remote sensing estimates and the atmospheric model are intrinsically incorporated into our uncertainty estimate based on the residual error of these two  $PM_{2.5}$  prediction approaches to the ground data.

### ***Uncertainty in the counterfactual concentration***

We define the counterfactual concentration as the lowest exposure level at which we have a reasonable degree of confidence in the range of concentrations to which our outdoor air pollution RR estimates apply. Specifically, we define the counterfactual concentration  $z_{cf}$  as a uniform random variable with lower bound defined by the minimum concentration observed in the American Cancer Society Cancer Prevention II cohort (Krewski et al. 2009) of  $5.8\mu\text{g}/\text{m}^3$  and an upper bound defined by the 5<sup>th</sup> percentile of  $8.8\mu\text{g}/\text{m}^3$ . One thousand draws from this uniform distribution were taken and sequentially applied to the 1000 draws of the source specific RRs in order to estimate  $(\alpha, \beta, \delta)$  1000 times.

### ***Uncertainty in the population attributable risk***

For each grid cell within each country a concentration value was independently drawn from the  $\text{PM}_{2.5}$  uncertainty distribution. Based on the randomly selected concentration in a grid cell, 1000 estimates of  $(\alpha, \beta, \delta)$  and  $z_{cf}$  were determined and from these values 1000 values  $1000 RR_{IER}$  values were estimated. Then 1000 population-weighted RRs were calculated for each country using the grid cell specific  $RR_{IER}$  values. Finally 1000 country-specific PAFs were determined. The mean of these 1000 PAF values was used as our central estimate and the 2.5% and 97.5% values among the 1000 PAFs determined were used to form the lower and upper confidence intervals respectively.

## **Age-modification risk models for ischemic heart disease and stroke mortality**

Epidemiologic studies of risk factors for both IHD and stroke indicate that the RR declines with the logarithm of age, reaching 1 between 100 and 120 (Singh et al. 2013). We thus modified the

type-specific RR for both IHD and stroke mortality using a linear regression model of the logarithm of the median age at death for each study with intercept equal to 1 at age 110. The slope of the regression line was estimated from a meta-analysis of several risk factors (Singh et al. 2013). We applied this age-modification to the RRs and fit the IER model for each age group separately. We compared the country specific estimated PAFs using the age-modified models to those models using age independent data.

Age-modified  $RR_{IER}$  curves are displayed for IHD and stroke mortality in Figure S15 (top panels) with generally decreasing risk with increasing age. The country-specific PAFs based on risk models not modified by age and those in which age-modification models were used for both IHD and stroke mortality are presented in Figure S15 (bottom panels). Incorporation of age-modification risk models tends to slightly decrease the PAF estimates.

We compared the distributions of country-specific estimated PAFs for the eight RR models for the five health outcomes (Figure S15). The PAFs were clearly sensitive to the risk model with large variations observed between model specifications for the four causes of death but similar predictions for ALRI. The linear risk model yielded the lowest PAFs for all five health outcomes but the relative ranking in PAFs among models was dependent the cause of death.

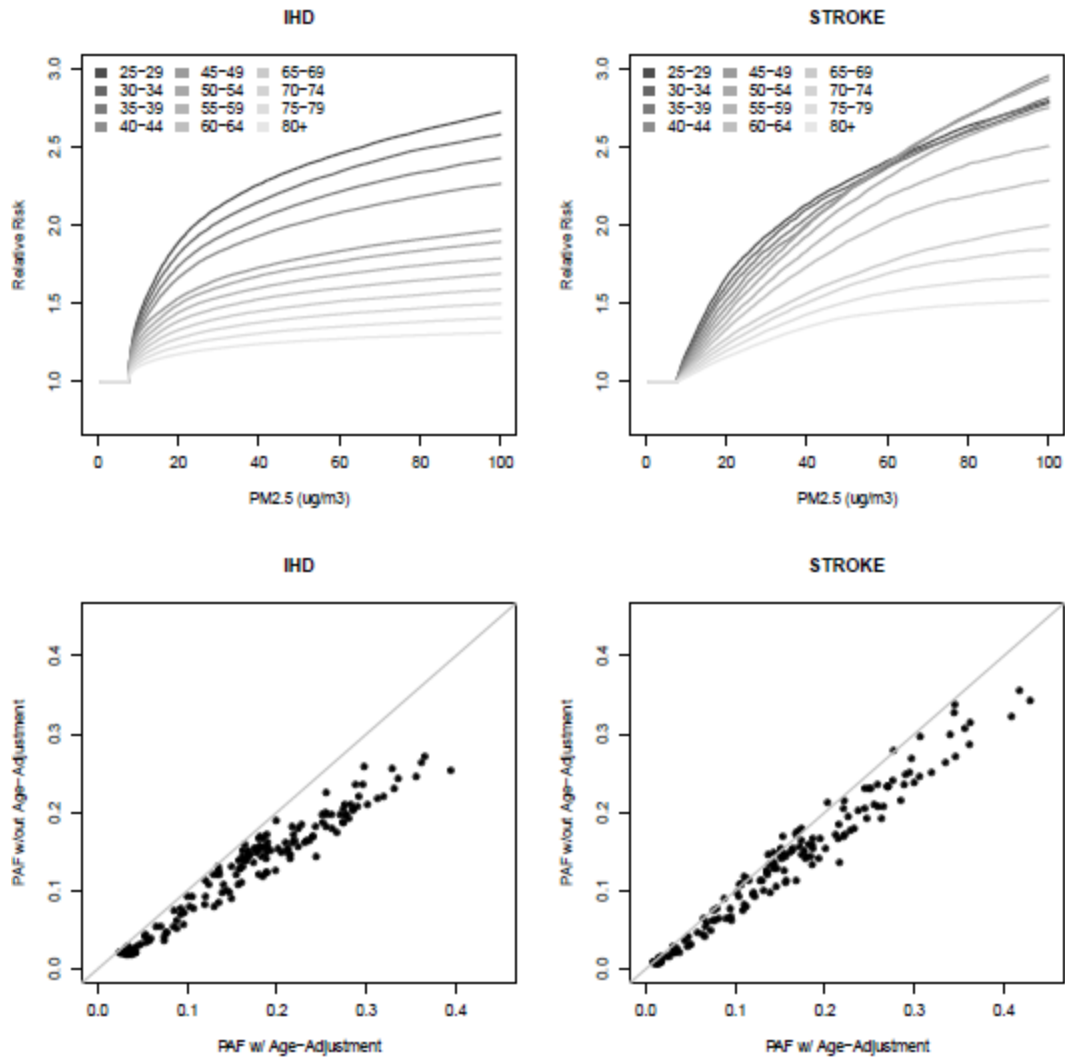

**Figure S15.** Integrated exposure-response (IER) curves for ischemic heart disease (IHD) (upper left hand panel) and stroke (upper right hand panel) by age group. Comparison of country-specific population attributable risk (PAF) with (y-axis) and without (x-axis) age adjustment for IHD (bottom left panel) and stroke (bottom right panel) with 1:1 line.

## References

- Akiba S, Kato H, Blot WJ. Passive smoking and lung cancer among Japanese women. *Cancer Research* 1986;46(9):4804–7.
- Baker RJ, Hertz-Picciotto I, Dostal M, Keller JA, Nozicka J, Kotesovec F, Dejmek J, Loomis D, Sram RJ: Coal home heating and environmental tobacco smoke in relation to lower respiratory illness in Czech children, from birth to 3 years of age. *Environ Health Perspect* 2006, 114:1126-1132.
- Beelen R, Hoek G, van den Brandt AP, Goldbohm RA, Fischer P, Schouten LJ, Jerrett M, Hughes E, Armstrong B, Brunekreef B. 2008. Long-Term Effects of Traffic-Related Air Pollution on Mortality in a Dutch Cohort (NLCS-AIR Study). *Environ. Health Perspect.* 116:196–202.
- Blizzard L, Ponsonby A-L, Dwyer T, Venn A, Cochrane JA: Parental smoking and infant respiratory infection: how important is not smoking in the same room with the baby? *Am J Public Health* 2003, 93:482-488
- Boffetta P, Ahrens W, Nyberg F, Mukeria A, Brüske-Hohlfeld I, Fortes C, Constantinescu V, Simonato L, Batura-Gabryel H, Lea S, et al. Exposure to environmental tobacco smoke and risk of adenocarcinoma of the lung. *International Journal of Cancer* 1999;83(5):635–9.
- Bonu S, Rani M, Jha P, Peters DH, Nguyen SN: Household tobacco and alcohol use, and child health: an exploratory study from India. *Health Policy* 2004, 70:67-83.
- Brauer M, Hoek G, Van Vliet P, Meliefste K, Fischer PH, Wijga A, et al. 2002. Air pollution from traffic and the development of respiratory infections and asthmatic and allergic symptoms in children. *Am J Respir Crit Care Med* 166:1092–1098.
- Brauer M, Amann M, Burnett RT, Cohen A, Denterner F, Ezzati M, Henderson SB, Krzyzanowski M, Martin RV, Van Dingenen R, van Donkelaar A, Thurston GD. 2012. Exposure assessment for estimation of the global burden of disease attributable to outdoor air pollution. *Environ. Sci. & Technol.* 46:652–660.
- Broor S, Pandey RM, Ghosh M, Maitreyi RS, Lodha R, Singhal T, Kabra SK: Risk factors for severe acute lower respiratory tract infection in under-five children. *Indian Pediatr* 2001, 38:1361-1369.



- Brownson RC, Alavanja MCR, Hock ET, Loy TS. Passive smoking and lung cancer in nonsmoking women. *American Journal of Public Health* 1992; 82(11):1525–30.
- Brownson RC, Reif JS, Keefe TJ, Ferguson SW, Pritzl JA. Risk factors for adenocarcinoma of the lung. *American Journal of Epidemiology* 1987;125(1):25–34.
- Buffler PA, Pickle LW, Mason TJ, Contant C. The causes of lung cancer in Texas. In: Mizell M, Correa P, editors. *Lung Cancer: Causes and Prevention*. Deerfield Beach (FL): VerlagChemie International, 1984:83–99.
- Butler TL. The relationship of passive smoking to various health outcomes among Seventh-day Adventists in California [dissertation]. Los Angeles: University of California, 1988.
- Cardenas VM, Thun MJ, Austin H, Lally CA, Clark WS, Greenberg RS, Heath CW Jr. Environmental tobacco smoke and lung cancer mortality in the American Cancer Society's Cancer Prevention Study II. *Cancer Causes and Control* 1997;8(1):57–64.
- Chan WC, Fung SC. Lung cancer in non-smokers in Hong Kong. In: Grundmann E, Clemmesen J, Muir CS, editors. *Geographical Pathology in Cancer Epidemiology*. Cancer Campaign. Vol. 6. New York: Gustav Fischer Verlag, 1982:199–202.
- Chen LH, Knutsen SF, Shavlik D, Beeson LW, Petersen F, Ghamsary M, Abbey D. 2005. The Association between Fatal Coronary Heart Disease and Ambient Particulate Air Pollution: Are Females at Greater Risk? *Environ. Health Perspect.* 113:1723–1729.
- Chen Y: Environmental tobacco smoke, low birth weight, and hospitalization for respiratory disease. *Am J Respir Crit Care Med* 1994, 150:54-58.
- Ciruzzi M, Pramparo P, Esteban O, Rozlosnik J, Tartaglione J, Abecasis B, César J, De Rosa J, Paterno C, Schargrodsky H. Case-control study of passive smoking at home and risk of acute myocardial infarction. *Journal of the American College of Cardiology* 1998;31(4):797–803.
- Cohen A, Anderson HR, Ostro B, Pandey K, Krzyzanowski M, Kunzli N et al. 2004. Urban air pollution. In: Ezzati M, Lopez A, Rodgers A, Murray CJL, eds. *Comparative quantification of health risks: global and regional burden of disease attributable to selected major risk factors*. Geneva, World Health Organization:1353–1433.
- Correa P, Pickle LW, Fontham E, Lin Y, Haenszel W. Passive smoking and lung cancer. *Lancet* 1983;2(8350):595–7.

- Duijts L, Jaddoe VWV, Hofman A, Steegers EAP, Mackenbach JP, de Jongste JC, Moll HA: Maternal smoking in pre-natal and early post-natal life and the risk of respiratory tract infections in infancy. The Generation R study. *Eur J Epidemiol* 2008, 23:547-555.
- Ekwo EE, Weinberger MM, Lachenbruch PA, Huntley WH: Relationship of parental smoking and gas cooking to respiratory disease in children. *Chest* 1983, 84:662-668.
- Etiler N, Velipasaoglu S, Aktekin M: Incidence of acute respiratory infections and the relationship with some factors in infancy in Antalya, Turkey. *PediatrInt* 2002, 44:64-69.
- Ferris BG Jr, Ware JH, Berkey CS, Dockery DW, Spiro A, Speizer FE: Effects of passive smoking on health of children. *Environ Health Perspect* 1985, 62:289-295.
- Fontham ETH, Correa P, Reynolds P, Wu-Williams A, Buffler PA, Greenberg RS, Chen VW, Alterman T, Boyd P, Austin DF, et al. Environmental tobacco smoke and lung cancer in nonsmoking women: a multicenter study. *Journal of the American Medical Association* 1994;271(22):1752-9.
- Forastiere F, Corbo GM, Michelozzi P, Pistelli R, Agabiti N, Brancato G, Ciappi G, Perucci CA: Effects of environment and passive smoking on the respiratory health of children. *Int J Epidemiol* 1992, 21:66-73.
- Gardner G, Frank AL, Taber LH: Effects of social and family factors on viral respiratory infection and illness in the first year of life. *J Epidemiol Community Health* 1984, 38:42-48.
- Garfinkel L, Auerbach O, Joubert L. Involuntary smoking and lung cancer: a case-control study. *Journal of the National Cancer Institute* 1985;75(3):463-9.
- Gao Y-T, Blot WJ, Zheng W, Ershow AG, Hsu CW, Levin LI, Zhang R, Fraumeni JF Jr. Lung cancer among Chinese women. *International Journal of Cancer* 1987;40(5):604-9.
- Geng G-Y, Liang ZH, Zhang A-Y, Wu GL. On the relationship between smoking and female lung cancer. In: Aoki M, Hisamichi S, Tominaga S, editors. *Smoking and Health 1987. Proceedings of the 6th World Conference on Smoking and Health, Nov 9-12, 1987; Tokyo.* Amsterdam: Elsevier Science, 1988:483-6.
- Gillis C, Hole D, Hawthorne V et al. The effect of environmental tobacco smoke in two urban communities in the west of Scotland *Eur J Respir Dis Suppl* 1984;133:121-6.
- Glymour M, Defries T, Kawachi I et al. Spousal smoking and incidence of first stroke: the Health and Retirement Study. *Am J Prev Med* 2008;35(3):245-8.

- Hassan MK, Al-Sadoon I: Risk factors for severe pneumonia in children in Basrah. *Trop Doct* 2001, 31:139-141.
- He Y, Lam TH, Li LS, Du RY, Jia GL, Huang JY, Zheng JS. Passive smoking at work as a risk factor for coronary heart disease in Chinese women who have never smoked. *British Medical Journal* 1994;308(6925):380-4.
- Hertz-Picciotto I, Baker RJ, Yaw PS, Dostal M, Joad JP, Lipsett M, et al. 2007. Early childhood lower respiratory illness and air pollution. *Environ Health Perspect* 115:1510-1526. doi:[10.1289/ehp.9617](https://doi.org/10.1289/ehp.9617)
- Hill SE, Blakely T, Kawachi I et al. Mortality among lifelong nonsmokers exposed to secondhand smoke at home: Cohort data and sensitivity analyses. *Am J Epidemiol* 2007;165:530-40.
- Hirayama T. Passive smoking [letter]. *New Zealand Medical Journal* 1990;103(883):54.
- Hirayama T. Non-smoking wives of heavy smokers have a higher risk of lung cancer: a study from Japan. *British Medical Journal* 1981;282(6259):183-5.
- Hole DJ, Gillis CR, Chopra C, Hawthorne VM. Passive smoking and cardiorespiratory health in a general population in the west of Scotland. *British Medical Journal* 1989;299(6696):423-7.
- Humble CG, Samet JM, Pathak DR. Marriage to a smoker and lung cancer risk. *American Journal of Public Health* 1987;77(5):598-602.
- Iribarren C, Darbinian J, Klatsky AL et al. Cohort study of exposure to environmental tobacco smoke and risk of first ischemic stroke and transient ischemic attack. *Neuroepidemiology* 2004;23(1-2):38-44.
- Inoue R, Hirayama T. Passive smoking and lung cancer in women. In: Aoki M, Hisamichi S, Tominaga S, editors. *Smoking and Health 1987*. Proceedings of the 6th World Conference on Smoking and Health, Nov 9-12, 1987; Tokyo. Amsterdam: Elsevier Science, 1988:283-5.
- Jefferis BJ, Lawlor DA, Ebrahim S et al. Cotinine assessed secondhand smoke exposure and risk of cardiovascular disease in older adults. *Heart* 2010;96(11):854-9.

- Johnson KC, Hu J, Mao Y, the Canadian Cancer Registries Epidemiology Research Group. Lifetime residential and workplace exposure to environmental tobacco smoke and lung cancer in never-smoking women, Canada 1994–97. *International Journal of Cancer* 2001;93(6):902–6.
- Kabat GC, Stellman SD, Wynder EL. Relation between exposure to environmental tobacco smoke and lung cancer in lifetime nonsmokers. *American Journal of Epidemiology* 1995;142(2):141–8.
- Kabat GC, Wynder EL. Lung cancer in nonsmokers. *Cancer* 1984;53(5):1214–21.
- Kalandidi A, Katsouyanni K, Voropoulou N, Bastas G, Saracci R, Trichopoulos D. Passive smoking and diet in the etiology of lung cancer among nonsmokers. *Cancer Causes and Control* 1990;1(1):15–21.
- Karr C, Lumley T, Schreuder A, Davis R, Larson T, Ritz B, et al. 2007. Effects of subchronic and chronic exposure to ambient air pollutants on infant bronchiolitis. *Am J Epidemiol* 165(5):553–560. doi:[10.1093/aje/kwk032](https://doi.org/10.1093/aje/kwk032).
- Karr CJ, Rudra CB, Miller KA, Gould TR, Larson T, Sathyanarayana S, 2009. Infant exposure to fine particulate matter and traffic and risk of hospitalization for RSV bronchiolitis in a region with lower ambient air pollution. *Environ Res* 109(3):321–327. doi:[10.1016/j.envres.2008.11.006](https://doi.org/10.1016/j.envres.2008.11.006).
- Ko Y-C, Lee CH, Chen MJ, Huang CC, Chang WY, Lin HJ, Wang HZ, Chang PY. Risk factors for primary lung cancer among non-smoking women in Taiwan. *International Journal of Epidemiology* 1997; 26(1):24–31.
- Koch A, Molbak K, Homoe P, Sorensen P, Hjuler T, Olesen ME, Pejil J, Pedersen FK, Olsen OR, Melbye M: Risk factors for acute respiratory tract infections in young Greenlandic children. *Am J Epidemiol* 2003, 158:374-384.
- Koo LC, Ho JH-C, Saw D, Ho C-Y. Measurements of passive smoking and estimates of lung cancer risk among non-smoking Chinese females. *International Journal of Cancer* 1987;39(2):162–9.

- Krewski D, Jerrett M, Burnett RT, Ma R, Hughes E, Shi Y, et al. 2009. Extended Follow-Up and Spatial Analysis of the American Cancer Society Study Linking Particulate Air Pollution and Mortality. HEI Research Report 140. Boston, MA: Health Effects Institute. Available: <http://pubs.healtheffects.org/getfile.php?u=478>.
- Kristensen IA, Olsen J: Determinants of acute respiratory infections in Soweto--a population-based birth cohort. *S Afr Med J* 2006, 96:633-640.
- La Vecchia C, D'Avanzo B, Franzosi MG, Tognoni G. Passive smoking and the risk of acute myocardial infarction. *Lancet* 1993;341(8843):505-6.
- Lam TH, Kung ITM, Wong CM, Lam WK, Kleevens JWL, Saw D, Hsu C, Seneviratne S, Lam SY, Lo KK, et al. Smoking, passive smoking and histological types in lung cancer in Hong Kong Chinese women. *British Journal of Cancer* 1987;56(5):673-8.
- Lee C-H, Ko Y-C, Goggins W, Huang J-J, Huang M-S, Kao E-L, Wang H-Z. Lifetime environmental exposure to tobacco smoke and primary lung cancer of non-smoking Taiwanese women. *International Journal of Epidemiology* 2000;29(2):224-31.
- Lepeule J, Ladon F, Dockery D, Schwartz J. (2012). Chronic exposure to fine particles and mortality: an extended follow-up of the Harvard Six Cities Study from 1974 to 2009. *Environ. Health Perspect.* 120:965-970.
- Lim SS, Vos T, Flaxman AD, Danaei G, Shibaya K, Adair-Rahani H, et al. (2012). A comparative risk assessment of burden of disease and injury attributable to 67 risk factors and risk factor clusters in 21 regions, 1990-2010: a systematic analysis for the Global Burden of Disease Study 2010. *Lancet* 380:2224-2260.
- Lipsett MJ, Ostro BD, Reynolds P, Goldberg D, Hertz A, Jerrett M, et al. 2011. Long-term Exposure to Air Pollution and Cardiorespiratory Disease in the California Teachers Study Cohort. *Am J Respir Crit Care Med.* 184: 828-83.
- Liu Q, Sasco AJ, Riboli E, Hu MX. Indoor air pollution and lung cancer in Guangzhou, People's Republic of China. *American Journal of Epidemiology* 1993;137(2):145-54.
- Liu Z, He X, Chapman RS. Smoking and other risk factors for lung cancer in Xuanwei, China. *International Journal of Epidemiology* 1991;20(1):26-31.

- Margolis PA, Keyes LL, Greenberg RA, Bauman KE, LaVange LM: Urinary cotinine and parent history (questionnaire) as indicators of passive smoking and predictors of lower respiratory illness in infants. *Pediatr Pulmonol* 1997, 23:417-423.
- Miller KA, Siscovick DS, Sheppard L, Shepherd K, Sullivan JH, Anderson GL, et al. 2007. Long-Term Exposure to Air Pollution and Incidence of Cardiovascular Events in Women. *N. Engl. J. Med.* 356:447-58.
- Nuesslein TG, Beckers D, Rieger CH: Cotinine in meconium indicates risk for early respiratory tract infections. *Hum Exp Toxicol* 1999, 18:283-290.
- Nyberg F, Isaksson I, Harris JR, Pershagen G. Misclassification of smoking status and lung cancer risk from environmental tobacco smoke in never-smokers. *Epidemiology* 1997;8(3):304-9.
- Ogston SA, Florey CD, Walker CH: Association of infant alimentary and respiratory illness with parental smoking and other environmental factors. *J Epidemiol Community Health* 1987, 41:21-25.
- Ogston SA, Florey CD, Walker CH: The Tayside infant morbidity and mortality study: effect on health of using gas for cooking. *BMJ* 1985, 290:957-960.
- Ostro B. 2004. Outdoor Air Pollution: Assessing the Environmental Burden of Disease at National and Local Levels. Environmental Burden of Disease Series, No. 5. Pruss-Ustun A, Campbell-Lendrum, D, Corvalan C, Woodward A., eds. World Health Organization: Geneva. Available: [http://www.who.int/quantifying\\_ehimpacts/publications/ebd5.pdf](http://www.who.int/quantifying_ehimpacts/publications/ebd5.pdf).
- Pedreira FA, Guandolo VL, Feroli EJ, Mella GW, Weiss IP: Involuntary smoking and incidence of respiratory illness during the first year of life. *Pediatrics* 1985, 75:594-597.
- Pershagen G, Hrubec Z, Svensson C. Passive smoking and lung cancer in Swedish women. *American Journal of Epidemiology* 1987;125(1):17-24.
- Pope CA III, Burnett RT, Krewski D, Jerrett M, Shi Y, Calle EE, et al. 2009. Cardiovascular Mortality and Exposure to Fine Particulate Matter from Air Pollution and Cigarette Smoke: Shape of the Exposure-Response Relationship. *Circulation* 120:941-948.

- Pope CA III, Burnett RT, Turner MC, Cohen A, Krewski D, Jerrett M, Gapstur S, Thun MJ  
2011. Lung Cancer and Cardiovascular Disease Mortality Associated with Particulate Matter  
Exposure from Ambient Air Pollution and Cigarette Smoke: Shape of the Exposure-  
Response Relationships. *Environ. Health Perspect.* 119:1616-1621.
- Puett RC, Hart JE, Yanosky JD, Paciorek C, Schwartz J, Suh H, et al. 2009. Chronic Fine and  
Coarse Particulate Exposure, Mortality and Coronary Heart Disease in the Nurses' Health  
Study. *Environ. Health Perspect.* 117:1697-1729.
- Puett RC, Hart JE, Suh H, Mittleman M, Laden F. 2011. Particulate matter exposures, Mortality,  
and cardiovascular disease in the Health Professionals Follow-up Study. *Environ. Health  
Perspect.* 119:1130-1135.
- Qureshi AI, Suri MF, Kirmani JF et al. Cigarette smoking among spouses: Another risk factor  
for stroke in women. *Stroke* 2005;36(9):e74–6.
- Rosenlund M, Berglind N, Gustavsson A, Reuterwall C, Hallqvist J, Nyberg F, Pershagen G.  
Environmental tobacco smoke and myocardial infarction among never-smokers in the  
Stockholm Heart Epidemiology Program (SHEEP). *Epidemiology* 2001;12(5):558–64.
- Rylander E, Pershagen G, Eriksson M, Bermann G: Parental smoking, urinary cotinine, and  
wheezing bronchitis in children. *Epidemiology* 1995, 6:289-293.
- Sandler DP, Comstock GW, Helsing KJ et al. Deaths from all causes in non-smokers who lived  
with smokers. *Am J Public Health* 1989;79(2):163–7.
- Shen X-B, Wang G-X, Zhou B-S. Relation of exposure to environmental tobacco smoke and  
pulmonary adenocarcinoma in non-smoking women: a case control study in Nanjing.  
*Oncology Reports* 1998;5(5):1221–3.
- Shimizu H, Morishita M, Mizuno K, Masuda T, Ogura Y, Santo M, Nishimura M, Kunishima K,  
Karasawa K, Nishiwaki K, et al. A case-control study of lung cancer in nonsmoking women.  
*Tohoku Journal of Experimental Medicine* 1988;154(4):389–97.
- Singh GM, Danaei G, Farzadfar F, et al. 2013. The age-specific quantitative effects of metabolic  
risk factors on cardiovascular diseases and diabetes: a pooled analysis. *PLoS One* 8:e65174.
- Smith KR, McCracken JP, Weber MW, Hubbard A, Jenny A, Thompso LM, et al. 2011. Effect  
of reduction in household air pollution on childhood pneumonia in Guatemala (RESPIRE): a  
randomised controlled trial. *Lancet* 378:1717–26.

- Smith KR, Bruce N, Balakrishnan K, Adair-Rohani H, Balmes J, Chafe Z, et al. 2014. Millions dead: how do we know and what does it mean? Methods used in the Comparative Risk Assessment of Household Air Pollution, *Ann Rev of Public Health*, 35:27.1.- 27.23 (in press, 2014).
- Sobue T. Association of indoor pollution and passive smoking with lung cancer in Osaka, Japan. *International Journal of Epidemiology* 1990;19(Suppl 1): S62–S66.
- Steenland K, Thun M, Lally C, Heath C Jr. Environmental tobacco smoke and coronary heart disease in the American Cancer Society CPS-II cohort. *Circulation* 1996;94(4):622–8.
- Stockwell HG, Goldman AL, Lyman GH, Noss CI, Armstrong AW, Pinkham PA, Candelora EC, Brusa MR. Environmental tobacco smoke and lung cancer risk in nonsmoking women. *Journal of the National Cancer Institute* 1992;84(18):1417–22.
- Suzuki M, Thiem VD, Yanai H, Matsubayashi T, Yoshida LM, Tho LH, Minh TT, Anh DD, Kilgore PE, Ariyoshi K: Association of environmental tobacco smoking exposure with an increased risk of hospital admissions for pneumonia in children under 5 years of age in Vietnam. *Thorax* 2009, 64:484-489.
- Svensden KH, Kuller LH, Martin MJ, Ockene JK. Effects of passive smoking in the Multiple Risk Factor Intervention Trial. *American Journal of Epidemiology* 1987;126(5):783–95.
- Svensson C, Pershagen G, Klominek J. Smoking and passive smoking in relation to lung cancer in women. *ActaOncologica* 1989;28(5):623–9.
- Taylor B, Wadsworth J: Maternal smoking during pregnancy and lower respiratory tract illness in early life. *Arch Dis Child* 1987, 62:786-791.
- Trichopoulos D, Kalandidi A, Sparros L. Lung cancer and passive smoking: conclusion of Greek study [letter]. *Lancet* 1983;2(8351):677–8.
- Victora CG, Fuchs SC, Flores JA, Fonseca W, Kirkwood B: Risk factors for pneumonia among children in a Brazilian metropolitan area. *Pediatrics* 1994, 93:977-985.
- Wang T-J, Zhou B-S, Shi J-P. Lung cancer in nonsmoking Chinese women: a case-control study. *Lung Cancer* 1996;14(Suppl 1):S93–S98.
- Wen W, Shu XO, Gao Y-T et al. Environmental tobacco smoke and mortality in Chinese women who have never smoked: prospective cohort study. *BMJ* 2006;333(7564):376–00.



Whincup PH, Gilg JA, Emberson JR et al. Passive smoking and risk of coronary heart disease and stroke: prospective study with cotinine measurement. *BMJ* 2004;329:200–5.

World Health Organization. 2002. World Health Report 2002 - Reducing Risks, Promoting Healthy Life. WHO: Geneva. Available: [http://www.who.int/whr/2002/en/whr02\\_en.pdf](http://www.who.int/whr/2002/en/whr02_en.pdf).

Wu AH, Henderson BE, Pike MC, Yu MC. Smoking and other risk factors for lung cancer in women. *Journal of the National Cancer Institute* 1985;74(4):747–51.

Wu-Williams AH, Samet JH. Environmental tobacco smoke: exposure-response relationships in epidemiologic studies. *Risk Analysis* 1990;10(1):39–48.

Yamada S, Koizumi A, Iso H et al. Risk factors for fatal subarachnoid hemorrhage: the Japan Collaborative Cohort Study. *Stroke* 2003;34(12):2781–7.

Zaridze D, Maximovitch D, Zemlyanaya G, Aitakov ZN, Boffetta P. Exposure to environmental tobacco smoke and risk of lung cancer in non-smoking women from Moscow, Russia. *International Journal of Cancer* 1998;75(3):335–8.
